# Supplementary material for: Mendelian randomization study on the causal link between neutrophil extracellular traps and cardiovascular diseases
Source: Research Square preprint supplement (doi:10.21203/rs.3.rs-7056612/v1), 2025-08-22
Supplement: Supplementary file 1 [file 9fe9781a7975202984f3c60b.xlsx]

## Sheet: Sheet1
Table S2 IVs used in this study
chr.exposure	SNP	beta.exposure	pos.exposure	samplesize.exposure	se.exposure	pval.exposure	id.exposure		effect_allele.exposure	other_allele.exposure	eaf.exposure	exposure	mr_keep.exposure	pval_origin.exposure	data_source.exposure
1	rs10752777	0.1098	234386907	8189	0.0236	3.24698e-06	ebi-a-GCST004446		A	T	0.1163	Interleukin-6 levels	TRUE	reported	igd
2	rs13412535	-0.1164	224874874	8189	0.0215	7.34294e-08	ebi-a-GCST004446		A	G	0.2256	Interleukin-6 levels	TRUE	reported	igd
3	rs75101555	0.3667	152716682	8189	0.0781	2.59597e-06	ebi-a-GCST004446		G	C	0.01789	Interleukin-6 levels	TRUE	reported	igd
9	rs1333040	0.0738	22083404	8189	0.0158	3.16804e-06	ebi-a-GCST004446		T	C	0.5736	Interleukin-6 levels	TRUE	reported	igd
16	rs76856708	-0.3289	80729043	8189	0.07	2.61198e-06	ebi-a-GCST004446		C	T	0.03777	Interleukin-6 levels	TRUE	reported	igd
17	rs72831623	0.1973	45722293	8189	0.0372	1.078e-07	ebi-a-GCST004446		A	G	0.05268	Interleukin-6 levels	TRUE	reported	igd
20	rs73273528	0.2672	50431113	8189	0.0553	9.58098e-07	ebi-a-GCST004446		T	C	0.0338	Interleukin-6 levels	TRUE	reported	igd
20	rs1884910	-0.079	55026741	8189	0.0169	3.26002e-06	ebi-a-GCST004446		G	C	0.3628	Interleukin-6 levels	TRUE	reported	igd
2	rs385076	0.2432	32489851	3636	0.0248	1.65882e-22	ebi-a-GCST004441		C	T	0.6471	Interleukin-18 levels	TRUE	reported	igd
3	rs1656939	-0.1132	186432744	3636	0.0236	1.56401e-06	ebi-a-GCST004441		T	A	0.5199	Interleukin-18 levels	TRUE	reported	igd
4	rs4414903	-0.1161	178470496	3636	0.025	3.30697e-06	ebi-a-GCST004441		C	G	0.3996	Interleukin-18 levels	TRUE	reported	igd
4	rs4482818	-0.1286	65928497	3636	0.0244	1.45301e-07	ebi-a-GCST004441		G	A	0.3588	Interleukin-18 levels	TRUE	reported	igd
5	rs116383510	0.5426	2545650	3636	0.1056	2.99502e-07	ebi-a-GCST004441		C	A	0.01988	Interleukin-18 levels	TRUE	reported	igd
5	rs17229943	0.312	68682536	3636	0.0463	1.61696e-11	ebi-a-GCST004441		C	A	0.0497	Interleukin-18 levels	TRUE	reported	igd
5	rs115267715	0.4508	68535015	3636	0.08	1.72302e-08	ebi-a-GCST004441		T	C	0.01789	Interleukin-18 levels	TRUE	reported	igd
6	rs658805	0.1226	70909073	3636	0.0244	4.94197e-07	ebi-a-GCST004441		A	G	0.3131	Interleukin-18 levels	TRUE	reported	igd
7	rs1852105	-0.3036	63725595	3636	0.0661	4.31996e-06	ebi-a-GCST004441		C	T	0.9513	Interleukin-18 levels	TRUE	reported	igd
7	rs78623212	0.8705	103307627	3636	0.1778	6.71104e-07	ebi-a-GCST004441		T	C	0.02386	Interleukin-18 levels	TRUE	reported	igd
7	rs117266781	0.6841	41301020	3636	0.1468	3.15e-06	ebi-a-GCST004441		T	C	0.01093	Interleukin-18 levels	TRUE	reported	igd
10	rs144841621	0.518	71681557	3636	0.1141	3.81101e-06	ebi-a-GCST004441		T	C	0.01093	Interleukin-18 levels	TRUE	reported	igd
11	rs2729385	0.1231	57262993	3636	0.0262	3.78504e-06	ebi-a-GCST004441		A	G	0.325	Interleukin-18 levels	TRUE	reported	igd
11	rs71478720	-0.2669	112009605	3636	0.0276	3.70766e-22	ebi-a-GCST004441		T	C	0.2177	Interleukin-18 levels	TRUE	reported	igd
15	rs1979967	0.1402	79659613	3636	0.0286	9.45301e-07	ebi-a-GCST004441		T	C	0.2594	Interleukin-18 levels	TRUE	reported	igd
16	rs143370787	0.3116	74951514	3636	0.066	2.35402e-06	ebi-a-GCST004441		G	C	0.07753	Interleukin-18 levels	TRUE	reported	igd
19	rs10414578	-0.1771	55146070	3636	0.035	4.15901e-07	ebi-a-GCST004441		T	C	0.1213	Interleukin-18 levels	TRUE	reported	igd
20	rs78716465	0.3265	40643726	3636	0.0682	1.63099e-06	ebi-a-GCST004441		A	G	0.03777	Interleukin-18 levels	TRUE	reported	igd
21	rs11700536	0.1156	44558687	3636	0.025	4.20901e-06	ebi-a-GCST004441		T	C	0.3618	Interleukin-18 levels	TRUE	reported	igd
7	rs143319329	0.2801	128139459	3309	0.0715	1.996e-06	ebi-a-GCST004448		T	C	0.02386	Interleukin-1β levels	TRUE	reported	igd
15	rs61335305	0.2966	66453074	3309	0.0724	1.89601e-06	ebi-a-GCST004448		A	C	0.01093	Interleukin-1β levels	TRUE	reported	igd
16	rs62015704	-0.1082	7467907	3309	0.0283	2.08699e-06	ebi-a-GCST004448		G	A	0.1213	Interleukin-1β levels	TRUE	reported	igd
17	rs9898641	0.2032	57571033	3309	0.0454	3.59203e-06	ebi-a-GCST004448		C	T	0.3598	Interleukin-1β levels	TRUE	reported	igd
18	rs1942793	0.0717	71104371	3309	0.0187	4.976e-06	ebi-a-GCST004448		T	G	0.4742	Interleukin-1β levels	TRUE	reported	igd
4	rs115669577	0.9889	124361448	3454	0.1995	8.284e-07	ebi-a-GCST004426		A	G	0.01193	TNF-a levels	TRUE	reported	igd
5	rs111332265	0.3766	150393107	3454	0.0754	6.62995e-07	ebi-a-GCST004426		G	A	0.07157	TNF-a levels	TRUE	reported	igd
8	rs79105320	0.5605	18817360	3454	0.1179	3.59203e-06	ebi-a-GCST004426		A	G	0.02087	TNF-a levels	TRUE	reported	igd
11	rs10834997	-0.1247	26526948	3454	0.0258	1.32902e-06	ebi-a-GCST004426		A	G	0.6402	TNF-a levels	TRUE	reported	igd
20	rs8121916	0.1306	12401325	3454	0.0278	2.72301e-06	ebi-a-GCST004426		A	C	0.2256	TNF-a levels	TRUE	reported	igd
1	rs79597994	-0.5831	151803047	8124	0.127	4.31698e-06	ebi-a-GCST004453		T	C	0.02783	Interleukin-4 levels	TRUE	reported	igd
1	rs116705532	0.4678	113705169	8124	0.0978	1.75501e-06	ebi-a-GCST004453		G	T	0.0169	Interleukin-4 levels	TRUE	reported	igd
3	rs4444693	0.0881	11704885	8124	0.0184	1.70098e-06	ebi-a-GCST004453		A	T	0.7982	Interleukin-4 levels	TRUE	reported	igd
3	rs7613691	-0.1775	147653591	8124	0.0384	4.048e-06	ebi-a-GCST004453		G	A	0.05268	Interleukin-4 levels	TRUE	reported	igd
4	rs13106889	-0.1161	175960753	8124	0.0225	2.27201e-07	ebi-a-GCST004453		A	T	0.1431	Interleukin-4 levels	TRUE	reported	igd
6	rs73023729	-0.1796	159654030	8124	0.0366	9.03296e-07	ebi-a-GCST004453		A	G	0.02286	Interleukin-4 levels	TRUE	reported	igd
7	rs17713451	0.1274	151162472	8124	0.0253	4.97004e-07	ebi-a-GCST004453		A	G	0.165	Interleukin-4 levels	TRUE	reported	igd
9	rs10512267	0.0824	102190129	8124	0.0161	2.93697e-07	ebi-a-GCST004453		C	T	0.33	Interleukin-4 levels	TRUE	reported	igd
9	rs117146485	0.2924	138824257	8124	0.0629	2.70901e-06	ebi-a-GCST004453		C	T	0.01491	Interleukin-4 levels	TRUE	reported	igd
13	rs9508291	0.1676	29710620	8124	0.0359	3.03201e-06	ebi-a-GCST004453		C	T	0.06461	Interleukin-4 levels	TRUE	reported	igd
18	rs2849346	-0.077	71086147	8124	0.0165	2.86702e-06	ebi-a-GCST004453		G	C	0.4463	Interleukin-4 levels	TRUE	reported	igd
20	rs9941733	-0.114	374061	8124	0.0229	6.88098e-07	ebi-a-GCST004453		G	A	0.175	Interleukin-4 levels	TRUE	reported	igd
2	rs7578892	0.1173	214953648	3364	0.0249	2.43703e-06	ebi-a-GCST004452		G	C	0.5358	Interleukin-5 levels	TRUE	reported	igd
2	rs11680908	-0.2634	110076751	3364	0.0554	2.03002e-06	ebi-a-GCST004452		G	A	0.05467	Interleukin-5 levels	TRUE	reported	igd
2	rs6737109	-0.116	23179531	3364	0.0247	2.399e-06	ebi-a-GCST004452		C	T	0.4254	Interleukin-5 levels	TRUE	reported	igd
6	rs7767396	-0.1515	43927050	3364	0.0246	7.69006e-10	ebi-a-GCST004452		G	A	0.4513	Interleukin-5 levels	TRUE	reported	igd
6	rs72831687	-0.5239	16092360	3364	0.1109	1.69099e-06	ebi-a-GCST004452		A	G	0.0169	Interleukin-5 levels	TRUE	reported	igd
19	rs73040130	-0.2638	36746190	3364	0.0529	6.00399e-07	ebi-a-GCST004452		C	T	0.06461	Interleukin-5 levels	TRUE	reported	igd
1	rs75383097	-0.536	62468634	3557	0.1165	4.28499e-06	ebi-a-GCST004443		C	G	0.01193	Interleukin-13 levels	TRUE	reported	igd
2	rs12623722	-0.1185	23178683	3557	0.0258	4.19199e-06	ebi-a-GCST004443		A	G	0.2823	Interleukin-13 levels	TRUE	reported	igd
3	rs6799107	0.1459	127057018	3557	0.0301	1.245e-06	ebi-a-GCST004443		C	T	0.2137	Interleukin-13 levels	TRUE	reported	igd
5	rs139083458	0.9902	26160518	3557	0.2107	2.81002e-06	ebi-a-GCST004443		T	C	0.0159	Interleukin-13 levels	TRUE	reported	igd
5	rs27949	-0.1168	58550823	3557	0.0252	3.42799e-06	ebi-a-GCST004443		T	C	0.6312	Interleukin-13 levels	TRUE	reported	igd
6	rs9472168	-0.4244	43928985	3557	0.0248	1.08094e-65	ebi-a-GCST004443		G	A	0.4493	Interleukin-13 levels	TRUE	reported	igd
6	rs142167313	0.313	44172097	3557	0.0617	3.97997e-07	ebi-a-GCST004443		C	T	0.01889	Interleukin-13 levels	TRUE	reported	igd
6	rs75995699	0.3319	5140856	3557	0.0698	2.64198e-06	ebi-a-GCST004443		A	G	0.02386	Interleukin-13 levels	TRUE	reported	igd
9	rs117795020	-0.3522	90084152	3557	0.0716	9.86211e-07	ebi-a-GCST004443		A	G	0.01789	Interleukin-13 levels	TRUE	reported	igd
10	rs7073807	-0.1682	69153428	3557	0.0356	2.374e-06	ebi-a-GCST004443		C	T	0.8827	Interleukin-13 levels	TRUE	reported	igd
19	rs147747784	0.3671	55118193	3557	0.0768	1.48799e-06	ebi-a-GCST004443		C	G	0.04573	Interleukin-13 levels	TRUE	reported	igd
21	rs76339001	0.4313	17511777	3557	0.0886	1.15199e-06	ebi-a-GCST004443		T	A	0.02087	Interleukin-13 levels	TRUE	reported	igd
1	rs147802074	-0.2016	245448314	5590	0.0418	1.42001e-06	ebi-a-GCST90013658		T	C	0.04573	Blood protein levels of myeloperoxidase-DNA complexes	TRUE	reported	igd
3	rs143727003	-0.4487	193098824	5590	0.0883	3.70101e-07	ebi-a-GCST90013658		T	C	0.01193	Blood protein levels of myeloperoxidase-DNA complexes	TRUE	reported	igd
3	rs13314784	-0.0782	45406592	5590	0.016	9.77597e-07	ebi-a-GCST90013658		C	T	0.4791	Blood protein levels of myeloperoxidase-DNA complexes	TRUE	reported	igd
3	rs7615041	0.086	6027486	5590	0.0187	4.469e-06	ebi-a-GCST90013658		A	G	0.1918	Blood protein levels of myeloperoxidase-DNA complexes	TRUE	reported	igd
4	rs289078	0.1027	31416764	5590	0.0202	3.508e-07	ebi-a-GCST90013658		A	T	0.8131	Blood protein levels of myeloperoxidase-DNA complexes	TRUE	reported	igd
6	rs10457220	-0.1917	110965818	5590	0.0414	3.586e-06	ebi-a-GCST90013658		C	T	0.05865	Blood protein levels of myeloperoxidase-DNA complexes	TRUE	reported	igd
7	rs143536055	0.7111	67554299	5590	0.1547	4.32305e-06	ebi-a-GCST90013658		G	T	0.01789	Blood protein levels of myeloperoxidase-DNA complexes	TRUE	reported	igd
8	rs67983734	0.2743	76119618	5590	0.0596	4.17696e-06	ebi-a-GCST90013658		T	C	0.03181	Blood protein levels of myeloperoxidase-DNA complexes	TRUE	reported	igd
9	rs10985542	-0.0984	124887090	5590	0.021	2.83602e-06	ebi-a-GCST90013658		A	G	0.8231	Blood protein levels of myeloperoxidase-DNA complexes	TRUE	reported	igd
14	rs117539923	-0.3353	92167474	5590	0.0726	3.89996e-06	ebi-a-GCST90013658		A	G	0.0159	Blood protein levels of myeloperoxidase-DNA complexes	TRUE	reported	igd
2	rs12053118	1	148601978	657	0.22	4.36545e-06	QcGIFf		TGCC	T	0.0595304	Neutrophil Extracellular Traps measurement	TRUE	reported
2	rs62172784	0.82	154824502	657	0.16	2.0872e-07	QcGIFf		G	A	0.101518	Neutrophil Extracellular Traps measurement	TRUE	reported
4	rs10027231	-0.51	67279595	657	0.11	1.76321e-06	QcGIFf		C	A	0.372956	Neutrophil Extracellular Traps measurement	TRUE	reported
4	rs2051756	0.56	107903545	657	0.12	2.59841e-06	QcGIFf		C	T	0.186584	Neutrophil Extracellular Traps measurement	TRUE	reported
5	rs73329516	0.87	163461522	657	0.18	2.38992e-06	QcGIFf		T	C	0.0583333	Neutrophil Extracellular Traps measurement	TRUE	reported
7	rs846294	0.5	42123925	657	0.1	1.07527e-06	QcGIFf		C	G	0.353285	Neutrophil Extracellular Traps measurement	TRUE	reported
8	rs2738098	0.5	6796042	657	0.11	2.25071e-06	QcGIFf		G	A	0.311502	Neutrophil Extracellular Traps measurement	TRUE	reported
10	rs3095792	0.81	103367787	657	0.17	4.63396e-06	QcGIFf		T	A	0.0973349	Neutrophil Extracellular Traps measurement	TRUE	reported
13	rs12874659	1.18	108343383	657	0.25	1.95849e-06	QcGIFf		C	T	0.0966819	Neutrophil Extracellular Traps measurement	TRUE	reported
14	rs17576011	0.93	31723626	657	0.19	1.04444e-06	QcGIFf		C	T	0.0622078	Neutrophil Extracellular Traps measurement	TRUE	reported
15	rs2930850	0.68	74589261	657	0.14	1.11796e-06	QcGIFf		G	A	0.161075	Neutrophil Extracellular Traps measurement	TRUE	reported
16	rs12926465	-0.62	48669637	657	0.13	2.08266e-06	QcGIFf		T	A	0.259824	Neutrophil Extracellular Traps measurement	TRUE	reported
16	rs12918182	-0.49	81832987	657	0.1	2.4127e-06	QcGIFf		A	T	0.60208	Neutrophil Extracellular Traps measurement	TRUE	reported
17	rs35659308	0.55	4825209	657	0.11	1.46939e-06	QcGIFf		A	G	0.19227	Neutrophil Extracellular Traps measurement	TRUE	reported
19	rs10406817	0.83	33854417	657	0.17	8.32554e-07	QcGIFf		C	G	0.136695	Neutrophil Extracellular Traps measurement	TRUE	reported
20	rs78230269	1.18	19249851	657	0.23	5.75551e-07	QcGIFf		C	G	0.0302298	Neutrophil Extracellular Traps measurement	TRUE	reported
21	rs12482056	0.91	26957749	657	0.17	7.78821e-08	QcGIFf		C	A	0.0664878	Neutrophil Extracellular Traps measurement	TRUE	reported
1	rs3762297	0.023896	31231680	519288	0.002522	2.83009e-21	ebi-a-GCST90002351		T	C	0.183345	Neutrophil count	TRUE	reported	igd
1	rs6678033	-0.042708	66077624	519288	0.001986	1.45881e-102	ebi-a-GCST90002351		A	G	0.367919	Neutrophil count	TRUE	reported	igd
1	rs694180	0.018797	111726213	519288	0.002017	1.23994e-20	ebi-a-GCST90002351		G	A	0.656276	Neutrophil count	TRUE	reported	igd
1	rs61801809	-0.013304	161557512	519288	0.00221	1.78999e-09	ebi-a-GCST90002351		T	C	0.354693	Neutrophil count	TRUE	reported	igd
1	rs35090781	-0.015165	214539519	519288	0.002769	4.42996e-08	ebi-a-GCST90002351		T	C	0.139693	Neutrophil count	TRUE	reported	igd
1	rs7536608	0.024251	224657092	519288	0.002339	3.72992e-25	ebi-a-GCST90002351		A	C	0.216567	Neutrophil count	TRUE	reported	igd
1	rs12037562	-0.013306	248047350	519288	0.002103	2.56e-10	ebi-a-GCST90002351		C	T	0.65979	Neutrophil count	TRUE	reported	igd
1	rs172933	0.012812	7844680	519288	0.002289	2.24001e-08	ebi-a-GCST90002351		C	T	0.773761	Neutrophil count	TRUE	reported	igd
1	rs1135172	0.012078	11301714	519288	0.002164	2.45997e-08	ebi-a-GCST90002351		G	A	0.729972	Neutrophil count	TRUE	reported	igd
1	rs6679677	-0.037885	114303808	519288	0.003175	8.6896e-33	ebi-a-GCST90002351		A	C	0.100303	Neutrophil count	TRUE	reported	igd
1	rs68002561	0.020207	149880863	519288	0.003384	2.43002e-09	ebi-a-GCST90002351		G	A	0.091374	Neutrophil count	TRUE	reported	igd
1	rs2312675	-0.019845	166922533	519288	0.002343	2.60976e-17	ebi-a-GCST90002351		C	T	0.211949	Neutrophil count	TRUE	reported	igd
1	rs1886654	-0.058459	236105910	519288	0.003081	3.07964e-80	ebi-a-GCST90002351		C	T	0.892013	Neutrophil count	TRUE	reported	igd
1	rs74076327	-0.038703	56979431	519288	0.004641	7.85055e-17	ebi-a-GCST90002351		C	T	0.044994	Neutrophil count	TRUE	reported	igd
1	rs55851397	0.012404	108761014	519288	0.002038	1.17999e-09	ebi-a-GCST90002351		A	C	0.364781	Neutrophil count	TRUE	reported	igd
1	rs114427170	0.031948	159240076	519288	0.005372	2.81002e-09	ebi-a-GCST90002351		A	G	0.036578	Neutrophil count	TRUE	reported	igd
1	rs60124939	-0.017814	174075302	519288	0.002517	1.51985e-12	ebi-a-GCST90002351		T	C	0.176181	Neutrophil count	TRUE	reported	igd
1	rs16843353	-0.035874	198543418	519288	0.005849	8.83995e-10	ebi-a-GCST90002351		C	G	0.030427	Neutrophil count	TRUE	reported	igd
1	rs2808519	0.016109	200361914	519288	0.002179	1.50003e-13	ebi-a-GCST90002351		T	G	0.737582	Neutrophil count	TRUE	reported	igd
1	rs10864368	0.023683	8918313	519288	0.001914	4.00959e-35	ebi-a-GCST90002351		C	T	0.502691	Neutrophil count	TRUE	reported	igd
1	rs10917107	-0.007112	22329414	519288	0.001245	1.13999e-08	ebi-a-GCST90002351		A	G	0.687344	Neutrophil count	TRUE	reported	igd
1	rs112203773	-0.011916	27019131	519288	0.002062	7.69999e-09	ebi-a-GCST90002351		A	C	0.082773	Neutrophil count	TRUE	reported	igd
1	rs11800162	0.063556	36970512	519288	0.007127	5.06991e-19	ebi-a-GCST90002351		T	C	0.019571	Neutrophil count	TRUE	reported	igd
1	rs150649461	0.052764	92925654	519288	0.008277	1.89998e-10	ebi-a-GCST90002351		C	G	0.015034	Neutrophil count	TRUE	reported	igd
1	rs116631966	0.040344	93229909	519288	0.006236	1.02e-10	ebi-a-GCST90002351		A	G	0.02482	Neutrophil count	TRUE	reported	igd
1	rs7555995	-0.014902	150212707	519288	0.002132	2.86022e-12	ebi-a-GCST90002351		G	C	0.284874	Neutrophil count	TRUE	reported	igd
1	rs34599082	-0.173021	159175494	519288	0.008416	7.26942e-94	ebi-a-GCST90002351		T	C	0.013435	Neutrophil count	TRUE	reported	igd
1	rs3845532	0.02744	161610372	519288	0.002871	1.27997e-21	ebi-a-GCST90002351		C	A	0.848364	Neutrophil count	TRUE	reported	igd
1	rs6593925	0.024219	205100663	519288	0.003389	9.2406e-13	ebi-a-GCST90002351		C	G	0.907585	Neutrophil count	TRUE	reported	igd
1	rs4844622	-0.023379	208034329	519288	0.002236	1.44012e-25	ebi-a-GCST90002351		T	C	0.240327	Neutrophil count	TRUE	reported	igd
1	rs486650	-0.013892	234819885	519288	0.001923	5.19039e-13	ebi-a-GCST90002351		T	C	0.469271	Neutrophil count	TRUE	reported	igd
1	rs301817	-0.014068	8503379	519288	0.001952	5.88979e-13	ebi-a-GCST90002351		A	C	0.583346	Neutrophil count	TRUE	reported	igd
1	rs284317	0.01361	10731625	519288	0.002018	1.59993e-11	ebi-a-GCST90002351		G	A	0.495955	Neutrophil count	TRUE	reported	igd
1	rs3917932	-0.05153	36943916	519288	0.001947	2.99916e-154	ebi-a-GCST90002351		G	C	0.577138	Neutrophil count	TRUE	reported	igd
1	rs3754224	-0.016714	43423622	519288	0.002194	2.70023e-14	ebi-a-GCST90002351		C	T	0.270043	Neutrophil count	TRUE	reported	igd
1	rs140958972	-0.019769	46428213	519288	0.001974	1.45011e-23	ebi-a-GCST90002351		G	A	0.435057	Neutrophil count	TRUE	reported	igd
1	rs12121236	0.015326	56617911	519288	0.002053	8.77001e-14	ebi-a-GCST90002351		A	C	0.351784	Neutrophil count	TRUE	reported	igd
1	rs17440390	0.016462	67190563	519288	0.002896	1.34999e-08	ebi-a-GCST90002351		T	C	0.126191	Neutrophil count	TRUE	reported	igd
1	rs41313381	0.058668	79411968	519288	0.005486	1.16011e-26	ebi-a-GCST90002351		A	C	0.030511	Neutrophil count	TRUE	reported	igd
1	rs41272536	-0.03588	183440531	519288	0.004892	2.33024e-13	ebi-a-GCST90002351		G	A	0.046043	Neutrophil count	TRUE	reported	igd
1	rs11580229	-0.023208	227210820	519288	0.002028	2.75994e-30	ebi-a-GCST90002351		A	G	0.46164	Neutrophil count	TRUE	reported	igd
1	rs2804804	0.021501	234925196	519288	0.002165	3.2802e-23	ebi-a-GCST90002351		G	A	0.549304	Neutrophil count	TRUE	reported	igd
1	rs35020138	-0.017619	247570221	519288	0.002063	1.42004e-17	ebi-a-GCST90002351		C	T	0.675273	Neutrophil count	TRUE	reported	igd
1	rs56188865	-0.027427	247606276	519288	0.001984	1.93019e-43	ebi-a-GCST90002351		C	T	0.373715	Neutrophil count	TRUE	reported	igd
2	rs75475627	0.033029	54787592	519288	0.00369	3.76011e-19	ebi-a-GCST90002351		G	C	0.076758	Neutrophil count	TRUE	reported	igd
2	rs4599108	-0.0192	85543222	519288	0.001994	6.57961e-22	ebi-a-GCST90002351		T	C	0.488121	Neutrophil count	TRUE	reported	igd
2	rs11691193	0.015007	111854524	519288	0.002371	2.52e-10	ebi-a-GCST90002351		T	C	0.217738	Neutrophil count	TRUE	reported	igd
2	rs75726191	0.023339	112914684	519288	0.002917	1.29003e-15	ebi-a-GCST90002351		T	C	0.135031	Neutrophil count	TRUE	reported	igd
2	rs62189859	0.014074	182254087	519288	0.002232	2.95999e-10	ebi-a-GCST90002351		C	T	0.244372	Neutrophil count	TRUE	reported	igd
2	rs1047891	-0.019307	211540507	519288	0.002064	8.79023e-21	ebi-a-GCST90002351		A	C	0.315122	Neutrophil count	TRUE	reported	igd
2	rs55729107	-0.017505	232582085	519288	0.002341	7.87046e-14	ebi-a-GCST90002351		G	A	0.225567	Neutrophil count	TRUE	reported	igd
2	rs116447416	-0.037054	37501547	519288	0.005232	1.46994e-12	ebi-a-GCST90002351		G	A	0.035073	Neutrophil count	TRUE	reported	igd
2	rs35789178	0.017959	102603925	519288	0.002466	3.41036e-13	ebi-a-GCST90002351		G	T	0.186171	Neutrophil count	TRUE	reported	igd
2	rs6734238	0.03936	113841030	519288	0.00195	1.58016e-90	ebi-a-GCST90002351		G	A	0.40298	Neutrophil count	TRUE	reported	igd
2	rs3856364	0.014282	145477217	519288	0.002069	5.27959e-12	ebi-a-GCST90002351		G	C	0.679714	Neutrophil count	TRUE	reported	igd
2	rs6432335	0.012236	12928971	519288	0.001931	2.42003e-10	ebi-a-GCST90002351		G	T	0.451562	Neutrophil count	TRUE	reported	igd
2	rs1260326	-0.032512	27730940	519288	0.001958	6.91035e-62	ebi-a-GCST90002351		C	T	0.602032	Neutrophil count	TRUE	reported	igd
2	rs6731993	0.022846	65642097	519288	0.001961	2.45019e-31	ebi-a-GCST90002351		T	A	0.408305	Neutrophil count	TRUE	reported	igd
2	rs11683933	0.030649	127886955	519288	0.004249	5.72005e-13	ebi-a-GCST90002351		A	C	0.055134	Neutrophil count	TRUE	reported	igd
2	rs6740847	0.021748	182308352	519288	0.00194	3.95003e-29	ebi-a-GCST90002351		G	A	0.562056	Neutrophil count	TRUE	reported	igd
2	rs13392977	0.028237	192514856	519288	0.004266	3.72992e-11	ebi-a-GCST90002351		A	G	0.053967	Neutrophil count	TRUE	reported	igd
2	rs9247	0.016358	234113301	519288	0.002544	1.31e-10	ebi-a-GCST90002351		T	C	0.190253	Neutrophil count	TRUE	reported	igd
2	rs1344760	0.028034	237775494	519288	0.002205	5.62989e-37	ebi-a-GCST90002351		T	C	0.741616	Neutrophil count	TRUE	reported	igd
2	rs2421200	-0.020525	61711815	519288	0.001917	1.02991e-26	ebi-a-GCST90002351		T	G	0.486641	Neutrophil count	TRUE	reported	igd
2	rs4954387	0.01393	136784344	519288	0.00236	3.67003e-09	ebi-a-GCST90002351		G	A	0.248467	Neutrophil count	TRUE	reported	igd
2	rs354703	0.01478	143883952	519288	0.001954	4.08037e-14	ebi-a-GCST90002351		C	T	0.593464	Neutrophil count	TRUE	reported	igd
2	rs188653407	-0.051211	160671563	519288	0.00647	2.57988e-15	ebi-a-GCST90002351		G	C	0.022861	Neutrophil count	TRUE	reported	igd
2	rs2729707	-0.035655	160687231	519288	0.002553	2.67979e-44	ebi-a-GCST90002351		G	A	0.830755	Neutrophil count	TRUE	reported	igd
2	rs2632372	-0.020982	169717541	519288	0.001915	6.68036e-28	ebi-a-GCST90002351		C	T	0.503861	Neutrophil count	TRUE	reported	igd
2	rs2052249	-0.01267	202665227	519288	0.002223	1.23001e-08	ebi-a-GCST90002351		A	C	0.250937	Neutrophil count	TRUE	reported	igd
2	rs4632345	-0.012199	16702654	519288	0.00206	3.23996e-09	ebi-a-GCST90002351		A	G	0.677982	Neutrophil count	TRUE	reported	igd
2	rs36101491	0.021071	24387532	519288	0.002104	1.40994e-23	ebi-a-GCST90002351		T	C	0.294234	Neutrophil count	TRUE	reported	igd
2	rs7575465	-0.012733	27291661	519288	0.001942	5.70953e-11	ebi-a-GCST90002351		A	G	0.553396	Neutrophil count	TRUE	reported	igd
2	rs17030394	-0.016099	43354280	519288	0.00199	6.29071e-16	ebi-a-GCST90002351		G	A	0.386004	Neutrophil count	TRUE	reported	igd
2	rs77552263	0.048554	43786818	519288	0.00358	7.18952e-42	ebi-a-GCST90002351		A	G	0.077954	Neutrophil count	TRUE	reported	igd
2	rs2309996	0.023127	101735838	519288	0.002028	4.26973e-30	ebi-a-GCST90002351		G	T	0.62485	Neutrophil count	TRUE	reported	igd
2	rs11689257	-0.024562	162958353	519288	0.00388	2.50998e-10	ebi-a-GCST90002351		A	G	0.069886	Neutrophil count	TRUE	reported	igd
2	rs114050631	-0.16255	219020958	519288	0.010051	8.73977e-59	ebi-a-GCST90002351		T	C	0.011126	Neutrophil count	TRUE	reported	igd
2	rs11695689	0.011934	220018091	519288	0.002008	2.87998e-09	ebi-a-GCST90002351		C	A	0.63954	Neutrophil count	TRUE	reported	igd
2	rs79047930	0.053423	220165527	519288	0.008352	1.63999e-10	ebi-a-GCST90002351		T	C	0.014695	Neutrophil count	TRUE	reported	igd
3	rs56217149	0.017409	12962914	519288	0.002789	4.45e-10	ebi-a-GCST90002351		A	G	0.150714	Neutrophil count	TRUE	reported	igd
3	rs6442061	0.0173	47203783	519288	0.002052	3.67959e-17	ebi-a-GCST90002351		T	G	0.596124	Neutrophil count	TRUE	reported	igd
3	rs6779340	-0.015247	58033701	519288	0.002042	8.6896e-14	ebi-a-GCST90002351		G	C	0.336877	Neutrophil count	TRUE	reported	igd
3	rs3733120	-0.014592	63850299	519288	0.002418	1.63001e-09	ebi-a-GCST90002351		C	G	0.787817	Neutrophil count	TRUE	reported	igd
3	rs7639292	-0.022268	107295665	519288	0.00257	4.82948e-18	ebi-a-GCST90002351		T	C	0.169103	Neutrophil count	TRUE	reported	igd
3	rs9819371	-0.043123	141206800	519288	0.003916	3.63999e-28	ebi-a-GCST90002351		T	C	0.064869	Neutrophil count	TRUE	reported	igd
3	rs34834004	-0.012608	185991986	519288	0.001931	6.77018e-11	ebi-a-GCST90002351		G	T	0.505609	Neutrophil count	TRUE	reported	igd
3	rs7626444	-0.020801	196504902	519288	0.001946	1.26999e-26	ebi-a-GCST90002351		C	G	0.4215	Neutrophil count	TRUE	reported	igd
3	rs3749440	0.017362	183702089	519288	0.001984	2.19989e-18	ebi-a-GCST90002351		G	A	0.372369	Neutrophil count	TRUE	reported	igd
3	rs59519784	0.011747	186202997	519288	0.001953	1.84999e-09	ebi-a-GCST90002351		A	G	0.410141	Neutrophil count	TRUE	reported	igd
3	rs2734031	-0.067521	128301390	519288	0.003335	4.20049e-91	ebi-a-GCST90002351		C	T	0.907968	Neutrophil count	TRUE	reported	igd
3	rs6764912	-0.037245	128372487	519288	0.004039	3.13979e-20	ebi-a-GCST90002351		A	G	0.065313	Neutrophil count	TRUE	reported	igd
3	rs56082403	0.015453	156797225	519288	0.001973	5.08042e-15	ebi-a-GCST90002351		C	T	0.403508	Neutrophil count	TRUE	reported	igd
3	rs1366045	-0.021881	42909050	519288	0.001969	1.20005e-28	ebi-a-GCST90002351		C	T	0.38497	Neutrophil count	TRUE	reported	igd
3	rs4687892	-0.013915	119775428	519288	0.001986	2.5398e-12	ebi-a-GCST90002351		C	T	0.373798	Neutrophil count	TRUE	reported	igd
3	rs11716015	-0.012851	169320058	519288	0.001992	1.16001e-10	ebi-a-GCST90002351		T	C	0.635724	Neutrophil count	TRUE	reported	igd
3	rs56174170	0.016826	184091881	519288	0.002805	2.04e-09	ebi-a-GCST90002351		C	T	0.139347	Neutrophil count	TRUE	reported	igd
3	rs789858	0.013974	194405966	519288	0.001961	1.07004e-12	ebi-a-GCST90002351		T	C	0.403723	Neutrophil count	TRUE	reported	igd
3	rs12487658	0.017015	71528943	519288	0.002418	2.06016e-12	ebi-a-GCST90002351		T	C	0.801636	Neutrophil count	TRUE	reported	igd
3	rs11721064	0.01439	98408826	519288	0.001974	3.22033e-13	ebi-a-GCST90002351		T	G	0.609084	Neutrophil count	TRUE	reported	igd
3	rs55659176	0.022154	140927025	519288	0.002645	5.81969e-17	ebi-a-GCST90002351		T	C	0.16943	Neutrophil count	TRUE	reported	igd
3	rs11712552	0.030473	140957762	519288	0.002893	6.4506e-26	ebi-a-GCST90002351		G	A	0.126219	Neutrophil count	TRUE	reported	igd
3	rs2046934	0.015004	151057642	519288	0.002487	1.66001e-09	ebi-a-GCST90002351		A	G	0.82324	Neutrophil count	TRUE	reported	igd
4	rs140311179	-0.024877	26295540	519288	0.004378	1.36e-08	ebi-a-GCST90002351		G	C	0.051153	Neutrophil count	TRUE	reported	igd
4	rs16850073	0.052054	74703999	519288	0.001999	2.11836e-149	ebi-a-GCST90002351		T	C	0.374485	Neutrophil count	TRUE	reported	igd
4	rs1371794	-0.07253	74948054	519288	0.00198	1e-200	ebi-a-GCST90002351		C	A	0.622286	Neutrophil count	TRUE	reported	igd
4	rs2522440	0.018925	108644404	519288	0.003409	2.90001e-08	ebi-a-GCST90002351		C	T	0.911887	Neutrophil count	TRUE	reported	igd
4	rs2290846	0.018804	151199080	519288	0.002127	9.91973e-19	ebi-a-GCST90002351		A	G	0.284312	Neutrophil count	TRUE	reported	igd
4	rs6817881	0.014302	152223904	519288	0.001931	1.3499e-13	ebi-a-GCST90002351		T	C	0.499266	Neutrophil count	TRUE	reported	igd
4	rs35734242	0.023416	706700	519288	0.002022	5.42001e-31	ebi-a-GCST90002351		C	T	0.427831	Neutrophil count	TRUE	reported	igd
4	rs116114800	0.016927	41534310	519288	0.003047	2.83002e-08	ebi-a-GCST90002351		A	G	0.124487	Neutrophil count	TRUE	reported	igd
4	rs218264	0.031802	55408875	519288	0.002233	5.58985e-46	ebi-a-GCST90002351		T	A	0.250834	Neutrophil count	TRUE	reported	igd
4	rs11723621	-0.026932	72615362	519288	0.002109	2.66993e-37	ebi-a-GCST90002351		G	A	0.290775	Neutrophil count	TRUE	reported	igd
4	rs28530750	0.05608	36312542	519288	0.004812	2.35993e-31	ebi-a-GCST90002351		A	G	0.043105	Neutrophil count	TRUE	reported	igd
4	rs7687658	0.011065	88220509	519288	0.001937	1.13999e-08	ebi-a-GCST90002351		G	A	0.434196	Neutrophil count	TRUE	reported	igd
4	rs7679673	-0.023824	106061534	519288	0.001977	2.14981e-33	ebi-a-GCST90002351		A	C	0.379766	Neutrophil count	TRUE	reported	igd
4	rs4145952	-0.013326	120155806	519288	0.001959	1.05999e-11	ebi-a-GCST90002351		A	C	0.399341	Neutrophil count	TRUE	reported	igd
4	rs723585	-0.022283	55503194	519288	0.001915	2.9703e-31	ebi-a-GCST90002351		G	A	0.483522	Neutrophil count	TRUE	reported	igd
4	rs7684253	0.014152	57727311	519288	0.001942	3.29003e-13	ebi-a-GCST90002351		T	C	0.550374	Neutrophil count	TRUE	reported	igd
4	rs17213043	0.046028	105546979	519288	0.00579	1.97015e-15	ebi-a-GCST90002351		G	C	0.028346	Neutrophil count	TRUE	reported	igd
4	rs6855981	-0.016368	3148276	519288	0.001987	1.85012e-16	ebi-a-GCST90002351		A	G	0.372933	Neutrophil count	TRUE	reported	igd
4	rs6831368	-0.021595	6969919	519288	0.001999	3.65006e-27	ebi-a-GCST90002351		G	A	0.362388	Neutrophil count	TRUE	reported	igd
4	rs7658676	0.011122	39603132	519288	0.002017	3.57998e-08	ebi-a-GCST90002351		T	C	0.353026	Neutrophil count	TRUE	reported	igd
4	rs11735662	0.047562	145026126	519288	0.00534	5.58985e-19	ebi-a-GCST90002351		T	C	0.033581	Neutrophil count	TRUE	reported	igd
5	rs4535497	-0.014386	1107428	519288	0.002038	1.74985e-12	ebi-a-GCST90002351		A	C	0.569887	Neutrophil count	TRUE	reported	igd
5	rs1966479	0.014401	118627271	519288	0.002026	1.21004e-12	ebi-a-GCST90002351		G	A	0.660217	Neutrophil count	TRUE	reported	igd
5	rs2522051	0.024	131797578	519288	0.00193	1.88018e-35	ebi-a-GCST90002351		C	T	0.454362	Neutrophil count	TRUE	reported	igd
5	rs114363252	0.022973	142539162	519288	0.003753	9.52994e-10	ebi-a-GCST90002351		A	G	0.073544	Neutrophil count	TRUE	reported	igd
5	rs13190036	-0.021805	176737720	519288	0.003135	3.62994e-12	ebi-a-GCST90002351		G	A	0.891442	Neutrophil count	TRUE	reported	igd
5	rs7705526	0.033578	1285974	519288	0.002174	9.18967e-54	ebi-a-GCST90002351		A	C	0.327035	Neutrophil count	TRUE	reported	igd
5	rs62360185	-0.015947	57274612	519288	0.002452	8.05008e-11	ebi-a-GCST90002351		G	A	0.190708	Neutrophil count	TRUE	reported	igd
5	rs12658947	0.01303	57552464	519288	0.002195	3.01002e-09	ebi-a-GCST90002351		G	A	0.256773	Neutrophil count	TRUE	reported	igd
5	rs284440	-0.020405	156170215	519288	0.002614	6.16027e-15	ebi-a-GCST90002351		G	T	0.838384	Neutrophil count	TRUE	reported	igd
5	rs9885207	0.016187	173075213	519288	0.001953	1.22011e-16	ebi-a-GCST90002351		C	T	0.415999	Neutrophil count	TRUE	reported	igd
5	rs62375385	0.014183	86268229	519288	0.00243	5.45997e-09	ebi-a-GCST90002351		C	T	0.193932	Neutrophil count	TRUE	reported	igd
5	rs1445171	0.014312	100046075	519288	0.001927	1.15001e-13	ebi-a-GCST90002351		C	T	0.516908	Neutrophil count	TRUE	reported	igd
5	rs6860961	0.012348	133849687	519288	0.001946	2.30001e-10	ebi-a-GCST90002351		C	T	0.583273	Neutrophil count	TRUE	reported	igd
5	rs10447304	-0.016591	179172098	519288	0.001919	5.57956e-18	ebi-a-GCST90002351		A	G	0.505743	Neutrophil count	TRUE	reported	igd
5	rs155795	0.01337	179333233	519288	0.001986	1.71002e-11	ebi-a-GCST90002351		C	G	0.384255	Neutrophil count	TRUE	reported	igd
5	rs13189073	-0.018071	1307648	519288	0.003247	2.66999e-08	ebi-a-GCST90002351		A	G	0.114744	Neutrophil count	TRUE	reported	igd
5	rs464609	0.010683	34654477	519288	0.001927	3.02002e-08	ebi-a-GCST90002351		A	G	0.544404	Neutrophil count	TRUE	reported	igd
5	rs66514959	-0.025817	68611583	519288	0.001993	2.48028e-38	ebi-a-GCST90002351		A	G	0.444298	Neutrophil count	TRUE	reported	igd
5	rs6859727	-0.04036	71742622	519288	0.002931	4.29042e-43	ebi-a-GCST90002351		C	T	0.878025	Neutrophil count	TRUE	reported	igd
5	rs2432142	0.01491	96275201	519288	0.001945	1.89017e-14	ebi-a-GCST90002351		A	G	0.435047	Neutrophil count	TRUE	reported	igd
5	rs6878780	0.013346	122093740	519288	0.001938	6.01035e-12	ebi-a-GCST90002351		C	T	0.426457	Neutrophil count	TRUE	reported	igd
5	rs6881942	0.021326	141518653	519288	0.001932	2.75994e-28	ebi-a-GCST90002351		T	C	0.556093	Neutrophil count	TRUE	reported	igd
5	rs2561758	-0.034011	173205282	519288	0.002173	3.4898e-55	ebi-a-GCST90002351		G	A	0.72298	Neutrophil count	TRUE	reported	igd
5	rs10479004	0.01423	131842977	519288	0.001981	7.06968e-13	ebi-a-GCST90002351		T	G	0.512235	Neutrophil count	TRUE	reported	igd
5	rs11960649	-0.030634	148203144	519288	0.00199	1.9602e-53	ebi-a-GCST90002351		C	A	0.552546	Neutrophil count	TRUE	reported	igd
6	rs3777755	0.0137	12159699	519288	0.002081	4.77969e-11	ebi-a-GCST90002351		T	C	0.311419	Neutrophil count	TRUE	reported	igd
6	rs73428122	0.029608	29951049	519288	0.005011	3.53997e-09	ebi-a-GCST90002351		G	T	0.044426	Neutrophil count	TRUE	reported	igd
6	rs200801362	-0.059045	31555480	519288	0.003797	1.7402e-54	ebi-a-GCST90002351		C	T	0.160313	Neutrophil count	TRUE	reported	igd
6	rs68016381	-0.033783	43761645	519288	0.00442	2.22998e-14	ebi-a-GCST90002351		T	C	0.051299	Neutrophil count	TRUE	reported	igd
6	rs915125	-0.017639	82463376	519288	0.002142	1.91999e-16	ebi-a-GCST90002351		T	C	0.281985	Neutrophil count	TRUE	reported	igd
6	rs9402685	-0.033846	135419688	519288	0.002214	1.05003e-52	ebi-a-GCST90002351		C	T	0.256024	Neutrophil count	TRUE	reported	igd
6	rs9479025	0.010877	151698748	519288	0.001986	4.47003e-08	ebi-a-GCST90002351		T	A	0.518638	Neutrophil count	TRUE	reported	igd
6	rs6936191	0.018088	7201660	519288	0.001988	9.86961e-20	ebi-a-GCST90002351		C	T	0.608046	Neutrophil count	TRUE	reported	igd
6	rs4712614	-0.01986	21382765	519288	0.001977	1.03992e-23	ebi-a-GCST90002351		G	T	0.620331	Neutrophil count	TRUE	reported	igd
6	rs10944174	0.011967	86736239	519288	0.002166	3.36001e-08	ebi-a-GCST90002351		G	A	0.328708	Neutrophil count	TRUE	reported	igd
6	rs207253	-0.012355	90808423	519288	0.002018	9.41998e-10	ebi-a-GCST90002351		A	G	0.407863	Neutrophil count	TRUE	reported	igd
6	rs6924387	0.017269	137082948	519288	0.001967	1.72982e-18	ebi-a-GCST90002351		G	A	0.412169	Neutrophil count	TRUE	reported	igd
6	rs9390461	0.017735	147701217	519288	0.001926	3.4898e-20	ebi-a-GCST90002351		G	A	0.538879	Neutrophil count	TRUE	reported	igd
6	rs1611236	-0.018952	29748690	519288	0.002057	3.34965e-20	ebi-a-GCST90002351		A	G	0.322908	Neutrophil count	TRUE	reported	igd
6	rs68137036	-0.013048	43820215	519288	0.002135	1.02e-09	ebi-a-GCST90002351		G	A	0.285148	Neutrophil count	TRUE	reported	igd
6	rs9487053	0.025883	109619697	519288	0.001921	2.49977e-41	ebi-a-GCST90002351		C	T	0.522956	Neutrophil count	TRUE	reported	igd
6	rs10945542	0.011993	158752931	519288	0.001925	4.82003e-10	ebi-a-GCST90002351		T	C	0.521167	Neutrophil count	TRUE	reported	igd
6	rs12203592	0.013585	396321	519288	0.002405	1.66001e-08	ebi-a-GCST90002351		T	C	0.214291	Neutrophil count	TRUE	reported	igd
6	rs6915310	-0.032312	16758002	519288	0.00256	1.71002e-36	ebi-a-GCST90002351		T	C	0.173979	Neutrophil count	TRUE	reported	igd
6	rs2736429	-0.028416	31820643	519288	0.001985	2.03002e-46	ebi-a-GCST90002351		G	A	0.377765	Neutrophil count	TRUE	reported	igd
6	rs10948036	0.029687	42510305	519288	0.002362	3.4898e-36	ebi-a-GCST90002351		A	C	0.210175	Neutrophil count	TRUE	reported	igd
6	rs12189880	-0.016057	52366206	519288	0.002269	1.53993e-12	ebi-a-GCST90002351		T	C	0.240741	Neutrophil count	TRUE	reported	igd
6	rs6454596	-0.025302	87980735	519288	0.001921	1.38007e-39	ebi-a-GCST90002351		C	G	0.489705	Neutrophil count	TRUE	reported	igd
6	rs12214269	0.019394	135846518	519288	0.001922	6.59933e-24	ebi-a-GCST90002351		A	G	0.545471	Neutrophil count	TRUE	reported	igd
6	rs72978754	-0.025601	138053203	519288	0.003899	5.38022e-11	ebi-a-GCST90002351		C	T	0.065785	Neutrophil count	TRUE	reported	igd
6	rs212409	-0.021224	159470058	519288	0.001932	4.70977e-28	ebi-a-GCST90002351		A	G	0.554194	Neutrophil count	TRUE	reported	igd
6	rs1555244	0.021566	29337101	519288	0.002004	5.7597e-27	ebi-a-GCST90002351		T	C	0.64644	Neutrophil count	TRUE	reported	igd
6	rs9265980	0.057457	31316045	519288	0.002514	1.62181e-115	ebi-a-GCST90002351		A	G	0.176601	Neutrophil count	TRUE	reported	igd
6	rs9378212	0.059685	32445691	519288	0.001926	1e-200	ebi-a-GCST90002351		T	C	0.469078	Neutrophil count	TRUE	reported	igd
6	rs2856821	0.017298	33046742	519288	0.002336	1.35988e-13	ebi-a-GCST90002351		C	T	0.213838	Neutrophil count	TRUE	reported	igd
6	rs7738554	0.014527	41891995	519288	0.002216	5.70033e-11	ebi-a-GCST90002351		A	T	0.250954	Neutrophil count	TRUE	reported	igd
6	rs62429983	0.016402	121862273	519288	0.002723	1.76999e-09	ebi-a-GCST90002351		A	G	0.144922	Neutrophil count	TRUE	reported	igd
6	rs1490384	-0.014654	126851160	519288	0.001917	2.18978e-14	ebi-a-GCST90002351		T	C	0.501387	Neutrophil count	TRUE	reported	igd
7	rs2158799	0.052002	28277107	519288	0.00198	6.53131e-152	ebi-a-GCST90002351		G	C	0.611375	Neutrophil count	TRUE	reported	igd
7	rs798563	0.012598	2757867	519288	0.002134	3.67003e-09	ebi-a-GCST90002351		C	A	0.297345	Neutrophil count	TRUE	reported	igd
7	rs73049276	-0.03953	8022016	519288	0.004095	5.12979e-22	ebi-a-GCST90002351		A	G	0.058516	Neutrophil count	TRUE	reported	igd
7	rs2710804	0.019677	36084529	519288	0.001984	3.76011e-23	ebi-a-GCST90002351		C	T	0.376402	Neutrophil count	TRUE	reported	igd
7	rs981132	0.021149	50281539	519288	0.002054	7.87952e-25	ebi-a-GCST90002351		G	T	0.678258	Neutrophil count	TRUE	reported	igd
7	rs7790229	-0.01363	97919338	519288	0.001924	1.45011e-12	ebi-a-GCST90002351		A	G	0.492805	Neutrophil count	TRUE	reported	igd
7	rs35759345	0.012607	116388021	519288	0.001926	6.19013e-11	ebi-a-GCST90002351		T	C	0.449913	Neutrophil count	TRUE	reported	igd
7	rs12530608	-0.016172	18023617	519288	0.002739	3.63003e-09	ebi-a-GCST90002351		G	A	0.146298	Neutrophil count	TRUE	reported	igd
7	rs3735485	0.029483	45009341	519288	0.002681	4.19952e-28	ebi-a-GCST90002351		G	A	0.844938	Neutrophil count	TRUE	reported	igd
7	rs10252457	-0.013839	47337530	519288	0.001962	1.82012e-12	ebi-a-GCST90002351		G	A	0.425632	Neutrophil count	TRUE	reported	igd
7	rs62465399	-0.032736	65941570	519288	0.004633	1.65997e-12	ebi-a-GCST90002351		T	C	0.045469	Neutrophil count	TRUE	reported	igd
7	rs13231262	-0.0203	148886058	519288	0.002026	1.33999e-23	ebi-a-GCST90002351		T	C	0.655938	Neutrophil count	TRUE	reported	igd
7	rs1474419	0.017679	6692605	519288	0.001966	2.54976e-19	ebi-a-GCST90002351		C	T	0.578829	Neutrophil count	TRUE	reported	igd
7	rs7776857	-0.014833	22754768	519288	0.002034	3.16009e-13	ebi-a-GCST90002351		T	G	0.657131	Neutrophil count	TRUE	reported	igd
7	rs56388170	0.070039	28724374	519288	0.002132	1e-200	ebi-a-GCST90002351		T	G	0.293956	Neutrophil count	TRUE	reported	igd
7	rs76873475	-0.015119	75829199	519288	0.002649	1.17999e-08	ebi-a-GCST90002351		A	C	0.155842	Neutrophil count	TRUE	reported	igd
7	rs42033	0.038294	92237533	519288	0.002364	5.50935e-59	ebi-a-GCST90002351		T	A	0.208851	Neutrophil count	TRUE	reported	igd
7	rs445	-0.091294	92408370	519288	0.003231	1.36144e-175	ebi-a-GCST90002351		T	C	0.09833	Neutrophil count	TRUE	reported	igd
7	rs9656395	-0.022836	130575884	519288	0.003291	4.08037e-12	ebi-a-GCST90002351		G	A	0.095253	Neutrophil count	TRUE	reported	igd
7	rs6978000	0.013259	2411685	519288	0.002395	3.18999e-08	ebi-a-GCST90002351		T	A	0.209555	Neutrophil count	TRUE	reported	igd
7	rs62454712	-0.017878	6498057	519288	0.002346	2.63998e-14	ebi-a-GCST90002351		C	T	0.23946	Neutrophil count	TRUE	reported	igd
7	rs778732	0.026848	65822360	519288	0.003111	6.5298e-18	ebi-a-GCST90002351		T	C	0.107318	Neutrophil count	TRUE	reported	igd
7	rs33951980	-0.027627	73029437	519288	0.00287	6.62979e-22	ebi-a-GCST90002351		T	C	0.12936	Neutrophil count	TRUE	reported	igd
7	rs342242	-0.015768	106338989	519288	0.001933	3.61993e-16	ebi-a-GCST90002351		C	T	0.453135	Neutrophil count	TRUE	reported	igd
7	rs7803075	-0.019268	130742066	519288	0.002201	2.18978e-18	ebi-a-GCST90002351		G	A	0.73519	Neutrophil count	TRUE	reported	igd
8	rs6998846	0.01538	9193341	519288	0.002334	4.54046e-11	ebi-a-GCST90002351		A	G	0.782787	Neutrophil count	TRUE	reported	igd
8	rs34215892	0.038125	21767240	519288	0.006009	2.30001e-10	ebi-a-GCST90002351		A	G	0.028499	Neutrophil count	TRUE	reported	igd
8	rs12550612	-0.030838	22966769	519288	0.002548	1.08993e-33	ebi-a-GCST90002351		A	G	0.821991	Neutrophil count	TRUE	reported	igd
8	rs7846314	0.063921	61650831	519288	0.002458	4.69894e-149	ebi-a-GCST90002351		T	A	0.187341	Neutrophil count	TRUE	reported	igd
8	rs7815046	-0.013143	87054885	519288	0.002108	4.64997e-10	ebi-a-GCST90002351		C	A	0.303314	Neutrophil count	TRUE	reported	igd
8	rs73271394	0.0255	100853860	519288	0.004616	3.39e-08	ebi-a-GCST90002351		C	T	0.045484	Neutrophil count	TRUE	reported	igd
8	rs2954038	0.020874	126507389	519288	0.002097	2.63998e-23	ebi-a-GCST90002351		A	C	0.696903	Neutrophil count	TRUE	reported	igd
8	rs609264	0.012618	61548546	519288	0.001939	7.93049e-11	ebi-a-GCST90002351		G	T	0.528467	Neutrophil count	TRUE	reported	igd
8	rs4276676	-0.018005	68795618	519288	0.00193	1.16011e-20	ebi-a-GCST90002351		C	T	0.470378	Neutrophil count	TRUE	reported	igd
8	rs16939607	-0.028446	79013333	519288	0.002728	1.99022e-25	ebi-a-GCST90002351		A	G	0.146029	Neutrophil count	TRUE	reported	igd
8	rs59697075	-0.038247	130618150	519288	0.00202	6.4003e-80	ebi-a-GCST90002351		T	C	0.586811	Neutrophil count	TRUE	reported	igd
8	rs7005996	0.022897	142241681	519288	0.00345	3.32966e-11	ebi-a-GCST90002351		T	C	0.905961	Neutrophil count	TRUE	reported	igd
8	rs28723563	0.012279	126328974	519288	0.002104	5.54e-09	ebi-a-GCST90002351		C	T	0.595413	Neutrophil count	TRUE	reported	igd
8	rs12716647	0.014273	6901304	519288	0.002001	1.02991e-12	ebi-a-GCST90002351		C	G	0.637362	Neutrophil count	TRUE	reported	igd
8	rs6468341	0.018973	30279355	519288	0.002201	7.10068e-18	ebi-a-GCST90002351		C	T	0.742846	Neutrophil count	TRUE	reported	igd
8	rs45577137	0.036447	48651633	519288	0.005206	2.63027e-12	ebi-a-GCST90002351		G	A	0.04513	Neutrophil count	TRUE	reported	igd
8	rs28571765	-0.022365	55449281	519288	0.002368	3.80014e-21	ebi-a-GCST90002351		C	T	0.206001	Neutrophil count	TRUE	reported	igd
8	rs7816785	-0.021221	56797418	519288	0.001967	4.31023e-27	ebi-a-GCST90002351		T	C	0.605849	Neutrophil count	TRUE	reported	igd
8	rs4734879	-0.02134	106583124	519288	0.002144	2.63027e-23	ebi-a-GCST90002351		G	A	0.276452	Neutrophil count	TRUE	reported	igd
8	rs1991651	0.022916	10706411	519288	0.001983	7.39946e-31	ebi-a-GCST90002351		G	C	0.617966	Neutrophil count	TRUE	reported	igd
8	rs2923416	0.011252	42457038	519288	0.002051	4.20998e-08	ebi-a-GCST90002351		G	A	0.609864	Neutrophil count	TRUE	reported	igd
8	rs10104995	-0.022624	103901234	519288	0.002333	3.3597e-22	ebi-a-GCST90002351		T	C	0.230765	Neutrophil count	TRUE	reported	igd
8	rs145209947	-0.069112	130694185	519288	0.009024	1.9602e-14	ebi-a-GCST90002351		A	C	0.014085	Neutrophil count	TRUE	reported	igd
8	rs6985508	-0.027376	142337734	519288	0.002089	3.3597e-39	ebi-a-GCST90002351		A	G	0.357978	Neutrophil count	TRUE	reported	igd
9	rs2992836	0.027906	276053	519288	0.0025	6.64967e-29	ebi-a-GCST90002351		T	G	0.185912	Neutrophil count	TRUE	reported	igd
9	rs385893	0.023445	4763176	519288	0.001932	7.70016e-34	ebi-a-GCST90002351		C	T	0.521145	Neutrophil count	TRUE	reported	igd
9	rs10811668	-0.013505	22164991	519288	0.002386	1.55998e-08	ebi-a-GCST90002351		A	C	0.208459	Neutrophil count	TRUE	reported	igd
9	rs3793537	0.012622	35687556	519288	0.002117	2.55e-09	ebi-a-GCST90002351		C	G	0.291154	Neutrophil count	TRUE	reported	igd
9	rs10760690	0.011474	102281113	519288	0.002038	1.84999e-08	ebi-a-GCST90002351		T	G	0.374011	Neutrophil count	TRUE	reported	igd
9	rs10992394	0.01389	95433830	519288	0.002279	1.13999e-09	ebi-a-GCST90002351		A	G	0.230846	Neutrophil count	TRUE	reported	igd
9	rs117468663	0.019488	112745175	519288	0.002853	8.73977e-12	ebi-a-GCST90002351		T	A	0.133922	Neutrophil count	TRUE	reported	igd
9	rs7866863	0.013079	114657707	519288	0.002021	1e-10	ebi-a-GCST90002351		A	G	0.341388	Neutrophil count	TRUE	reported	igd
9	rs2519093	-0.040099	136141870	519288	0.00248	9.83105e-59	ebi-a-GCST90002351		T	C	0.184749	Neutrophil count	TRUE	reported	igd
9	rs2157770	0.02099	136921464	519288	0.002214	2.66993e-21	ebi-a-GCST90002351		G	A	0.287199	Neutrophil count	TRUE	reported	igd
9	rs2219143	0.019099	2622278	519288	0.00205	1.29987e-20	ebi-a-GCST90002351		A	G	0.394034	Neutrophil count	TRUE	reported	igd
9	rs3739873	-0.013878	34978431	519288	0.002347	3.45001e-09	ebi-a-GCST90002351		A	G	0.22025	Neutrophil count	TRUE	reported	igd
9	rs10868825	0.011508	73031065	519288	0.002066	2.59998e-08	ebi-a-GCST90002351		A	T	0.338117	Neutrophil count	TRUE	reported	igd
9	rs1411424	-0.011488	113892963	519288	0.001926	2.50998e-09	ebi-a-GCST90002351		A	G	0.523053	Neutrophil count	TRUE	reported	igd
9	rs17831500	-0.019905	116047472	519288	0.002302	5.64027e-18	ebi-a-GCST90002351		C	A	0.223581	Neutrophil count	TRUE	reported	igd
9	rs12378064	-0.013698	127191540	519288	0.002041	1.99022e-11	ebi-a-GCST90002351		T	C	0.649709	Neutrophil count	TRUE	reported	igd
9	rs4413892	0.033654	139330158	519288	0.002228	1.65006e-51	ebi-a-GCST90002351		A	G	0.277885	Neutrophil count	TRUE	reported	igd
9	rs9411293	-0.01398	139929015	519288	0.002118	4.18986e-11	ebi-a-GCST90002351		G	C	0.337095	Neutrophil count	TRUE	reported	igd
9	rs36051895	0.012782	4981866	519288	0.002122	1.75999e-09	ebi-a-GCST90002351		T	G	0.288954	Neutrophil count	TRUE	reported	igd
9	rs626416	-0.019685	79326680	519288	0.002278	5.77032e-18	ebi-a-GCST90002351		C	G	0.761969	Neutrophil count	TRUE	reported	igd
9	rs796007	-0.02067	86577541	519288	0.002211	9.41022e-21	ebi-a-GCST90002351		A	G	0.252821	Neutrophil count	TRUE	reported	igd
9	rs1288649	-0.012024	91426717	519288	0.002066	6.00994e-09	ebi-a-GCST90002351		G	T	0.612157	Neutrophil count	TRUE	reported	igd
10	rs2807742	0.032553	28781367	519288	0.002294	1.16011e-45	ebi-a-GCST90002351		A	G	0.771408	Neutrophil count	TRUE	reported	igd
10	rs72790862	-0.021031	44880260	519288	0.002085	6.70965e-24	ebi-a-GCST90002351		C	T	0.307083	Neutrophil count	TRUE	reported	igd
10	rs3747869	0.032659	73520632	519288	0.003343	1.61994e-22	ebi-a-GCST90002351		C	A	0.900896	Neutrophil count	TRUE	reported	igd
10	rs74149356	0.015822	93785201	519288	0.002638	2.06001e-09	ebi-a-GCST90002351		T	A	0.168721	Neutrophil count	TRUE	reported	igd
10	rs10509912	-0.021052	112029405	519288	0.00281	7.0194e-14	ebi-a-GCST90002351		A	T	0.134894	Neutrophil count	TRUE	reported	igd
10	rs72836628	-0.015453	113902454	519288	0.002227	4.07005e-12	ebi-a-GCST90002351		T	C	0.248064	Neutrophil count	TRUE	reported	igd
10	rs692594	0.012472	18265893	519288	0.001918	8.23e-11	ebi-a-GCST90002351		C	G	0.489752	Neutrophil count	TRUE	reported	igd
10	rs1571956	0.013715	30504708	519288	0.002029	1.42988e-11	ebi-a-GCST90002351		A	G	0.646094	Neutrophil count	TRUE	reported	igd
10	rs10995477	-0.030415	65010672	519288	0.001923	2.86022e-56	ebi-a-GCST90002351		C	T	0.473501	Neutrophil count	TRUE	reported	igd
10	rs1412445	0.021069	91002804	519288	0.002026	2.63998e-25	ebi-a-GCST90002351		T	C	0.338068	Neutrophil count	TRUE	reported	igd
10	rs1977289	-0.018227	96301907	519288	0.001918	2.13993e-21	ebi-a-GCST90002351		C	T	0.478516	Neutrophil count	TRUE	reported	igd
10	rs9419387	-0.012402	133758358	519288	0.001962	2.65999e-10	ebi-a-GCST90002351		A	G	0.405212	Neutrophil count	TRUE	reported	igd
10	rs10906393	0.01719	13536512	519288	0.001943	9.66051e-19	ebi-a-GCST90002351		T	A	0.577559	Neutrophil count	TRUE	reported	igd
10	rs9804265	-0.04002	25214050	519288	0.001997	2.78997e-89	ebi-a-GCST90002351		C	A	0.366957	Neutrophil count	TRUE	reported	igd
10	rs180941	-0.013018	115720674	519288	0.002003	8.32914e-11	ebi-a-GCST90002351		A	G	0.625196	Neutrophil count	TRUE	reported	igd
10	rs138645114	-0.034865	69586392	519288	0.004555	2.03986e-14	ebi-a-GCST90002351		G	T	0.055732	Neutrophil count	TRUE	reported	igd
10	rs2802372	-0.013907	81047575	519288	0.002029	7.44046e-12	ebi-a-GCST90002351		C	A	0.434926	Neutrophil count	TRUE	reported	igd
10	rs10786325	0.042348	99068738	519288	0.001955	6.05341e-104	ebi-a-GCST90002351		G	C	0.595938	Neutrophil count	TRUE	reported	igd
10	rs7917772	0.016148	104487443	519288	0.001992	5.41003e-16	ebi-a-GCST90002351		A	G	0.631343	Neutrophil count	TRUE	reported	igd
10	rs3781454	0.024234	126348565	519288	0.002094	6.26037e-31	ebi-a-GCST90002351		A	G	0.677892	Neutrophil count	TRUE	reported	igd
11	rs7929589	-0.015027	59975078	519288	0.001959	1.79019e-14	ebi-a-GCST90002351		T	C	0.406537	Neutrophil count	TRUE	reported	igd
11	rs7947929	0.015723	65625191	519288	0.002041	1.38007e-14	ebi-a-GCST90002351		A	G	0.666489	Neutrophil count	TRUE	reported	igd
11	rs61918362	0.01244	102003827	519288	0.002241	2.90001e-08	ebi-a-GCST90002351		A	T	0.262888	Neutrophil count	TRUE	reported	igd
11	rs14408	0.049297	308314	519288	0.002156	1.2106e-115	ebi-a-GCST90002351		C	T	0.36831	Neutrophil count	TRUE	reported	igd
11	rs9988894	0.014978	12876944	519288	0.002075	5.5195e-13	ebi-a-GCST90002351		G	C	0.323507	Neutrophil count	TRUE	reported	igd
11	rs35043339	0.013564	28067650	519288	0.002377	1.19001e-08	ebi-a-GCST90002351		A	C	0.230942	Neutrophil count	TRUE	reported	igd
11	rs174557	-0.024831	61581368	519288	0.002135	3.19007e-31	ebi-a-GCST90002351		G	A	0.307356	Neutrophil count	TRUE	reported	igd
11	rs2282611	-0.012603	76154846	519288	0.002063	1.03001e-09	ebi-a-GCST90002351		G	T	0.319925	Neutrophil count	TRUE	reported	igd
11	rs470631	0.013292	133989665	519288	0.0024	3.14e-08	ebi-a-GCST90002351		A	T	0.214985	Neutrophil count	TRUE	reported	igd
11	rs35375443	0.015451	9729432	519288	0.002264	9.13903e-12	ebi-a-GCST90002351		T	A	0.285213	Neutrophil count	TRUE	reported	igd
11	rs1840595	0.014714	18162482	519288	0.002287	1.29e-10	ebi-a-GCST90002351		T	C	0.230222	Neutrophil count	TRUE	reported	igd
11	rs58984522	-0.011027	43490624	519288	0.002017	4.70999e-08	ebi-a-GCST90002351		C	T	0.346098	Neutrophil count	TRUE	reported	igd
11	rs7131178	0.014492	93462607	519288	0.002474	4.79005e-09	ebi-a-GCST90002351		T	A	0.811752	Neutrophil count	TRUE	reported	igd
11	rs7934719	0.018084	108341864	519288	0.001959	2.81968e-20	ebi-a-GCST90002351		T	C	0.413488	Neutrophil count	TRUE	reported	igd
11	rs61904448	-0.014782	113958121	519288	0.002211	2.36974e-11	ebi-a-GCST90002351		C	T	0.284409	Neutrophil count	TRUE	reported	igd
11	rs8705	-0.018333	128328913	519288	0.002092	1.97015e-18	ebi-a-GCST90002351		A	G	0.31676	Neutrophil count	TRUE	reported	igd
11	rs4909932	0.013425	10475967	519288	0.001963	8.35988e-12	ebi-a-GCST90002351		G	A	0.597552	Neutrophil count	TRUE	reported	igd
11	rs1715460	0.020543	118122052	519288	0.002299	4.32016e-19	ebi-a-GCST90002351		G	C	0.741303	Neutrophil count	TRUE	reported	igd
11	rs10833024	0.01633	3010390	519288	0.002081	4.51024e-15	ebi-a-GCST90002351		T	C	0.310102	Neutrophil count	TRUE	reported	igd
11	rs11823949	0.019238	47723512	519288	0.00207	1.55991e-20	ebi-a-GCST90002351		A	G	0.347387	Neutrophil count	TRUE	reported	igd
11	rs73000965	0.029201	113982321	519288	0.002076	6.62979e-45	ebi-a-GCST90002351		A	T	0.315728	Neutrophil count	TRUE	reported	igd
11	rs546039	-0.011325	125770724	519288	0.002015	1.94998e-08	ebi-a-GCST90002351		T	C	0.609861	Neutrophil count	TRUE	reported	igd
12	rs10849020	-0.024062	4332009	519288	0.002361	2.33991e-24	ebi-a-GCST90002351		G	C	0.210147	Neutrophil count	TRUE	reported	igd
12	rs1245035	0.01631	64976049	519288	0.001998	3.39e-16	ebi-a-GCST90002351		A	C	0.628096	Neutrophil count	TRUE	reported	igd
12	rs4761234	0.021599	69732105	519288	0.001928	4.25011e-29	ebi-a-GCST90002351		C	T	0.483663	Neutrophil count	TRUE	reported	igd
12	rs9165	0.016162	122219787	519288	0.002159	7.32993e-14	ebi-a-GCST90002351		C	T	0.688393	Neutrophil count	TRUE	reported	igd
12	rs370591186	0.047734	123885930	519288	0.006484	1.89017e-13	ebi-a-GCST90002351		T	C	0.026417	Neutrophil count	TRUE	reported	igd
12	rs61754230	0.039977	72179446	519288	0.007114	1.96002e-08	ebi-a-GCST90002351		T	C	0.019363	Neutrophil count	TRUE	reported	igd
12	rs3184504	-0.029388	111884608	519288	0.001927	1.9002e-52	ebi-a-GCST90002351		C	T	0.517462	Neutrophil count	TRUE	reported	igd
12	rs7969023	-0.011389	26803949	519288	0.001959	6.23003e-09	ebi-a-GCST90002351		C	T	0.405651	Neutrophil count	TRUE	reported	igd
12	rs739842	-0.01138	48202046	519288	0.002057	3.23996e-08	ebi-a-GCST90002351		C	T	0.638916	Neutrophil count	TRUE	reported	igd
12	rs632887	0.014283	3392351	519288	0.002004	1.05999e-12	ebi-a-GCST90002351		G	A	0.410714	Neutrophil count	TRUE	reported	igd
12	rs28588142	0.015218	10097609	519288	0.002462	6.59994e-10	ebi-a-GCST90002351		T	C	0.188391	Neutrophil count	TRUE	reported	igd
12	rs7488780	-0.013665	20579392	519288	0.002391	1.12001e-08	ebi-a-GCST90002351		C	G	0.204545	Neutrophil count	TRUE	reported	igd
12	rs12426444	0.017833	50686512	519288	0.002007	6.6604e-19	ebi-a-GCST90002351		A	G	0.358042	Neutrophil count	TRUE	reported	igd
12	rs1700159	0.02158	52305786	519288	0.002327	1.91999e-20	ebi-a-GCST90002351		T	C	0.773937	Neutrophil count	TRUE	reported	igd
12	rs1042725	0.012765	66358347	519288	0.001924	3.32966e-11	ebi-a-GCST90002351		T	C	0.494436	Neutrophil count	TRUE	reported	igd
12	rs11104881	-0.025942	88843474	519288	0.002106	7.83971e-35	ebi-a-GCST90002351		C	T	0.701718	Neutrophil count	TRUE	reported	igd
12	rs35864914	-0.011366	108159191	519288	0.001982	1.01e-08	ebi-a-GCST90002351		T	C	0.37651	Neutrophil count	TRUE	reported	igd
12	rs10846411	0.016659	8206167	519288	0.002076	1.07994e-15	ebi-a-GCST90002351		G	A	0.687379	Neutrophil count	TRUE	reported	igd
12	rs11064881	-0.034163	120146925	519288	0.003693	2.36974e-20	ebi-a-GCST90002351		A	G	0.073489	Neutrophil count	TRUE	reported	igd
13	rs78738581	0.021293	42843630	519288	0.002282	1.13006e-20	ebi-a-GCST90002351		A	G	0.231943	Neutrophil count	TRUE	reported	igd
13	rs76603681	0.040772	28496468	519288	0.005573	2.64972e-13	ebi-a-GCST90002351		A	G	0.03196	Neutrophil count	TRUE	reported	igd
13	rs76428106	0.104475	28604007	519288	0.008878	6.25029e-32	ebi-a-GCST90002351		C	T	0.013438	Neutrophil count	TRUE	reported	igd
13	rs9543219	0.012822	73638478	519288	0.00195	5.06058e-11	ebi-a-GCST90002351		T	C	0.574059	Neutrophil count	TRUE	reported	igd
13	rs7325851	0.016345	50113215	519288	0.00227	6.32995e-13	ebi-a-GCST90002351		G	A	0.741194	Neutrophil count	TRUE	reported	igd
13	rs150861794	-0.052592	109003805	519288	0.007502	2.47002e-12	ebi-a-GCST90002351		T	C	0.019777	Neutrophil count	TRUE	reported	igd
13	rs2260850	0.02432	114185566	519288	0.002212	4.42996e-28	ebi-a-GCST90002351		G	T	0.280458	Neutrophil count	TRUE	reported	igd
13	rs9508005	-0.019939	28789794	519288	0.00356	2.18002e-08	ebi-a-GCST90002351		G	T	0.09447	Neutrophil count	TRUE	reported	igd
13	rs2296028	-0.01529	52345637	519288	0.002553	2.15998e-09	ebi-a-GCST90002351		C	G	0.17498	Neutrophil count	TRUE	reported	igd
14	rs2038700	0.033462	25461989	519288	0.00197	1.24997e-64	ebi-a-GCST90002351		C	T	0.394281	Neutrophil count	TRUE	reported	igd
14	rs34765661	0.041722	69852940	519288	0.003891	8.58025e-27	ebi-a-GCST90002351		C	T	0.065332	Neutrophil count	TRUE	reported	igd
14	rs12588718	0.014501	101149605	519288	0.002092	4.29042e-12	ebi-a-GCST90002351		C	G	0.66557	Neutrophil count	TRUE	reported	igd
14	rs2494748	0.013251	105258892	519288	0.002067	1.5e-10	ebi-a-GCST90002351		T	C	0.616193	Neutrophil count	TRUE	reported	igd
14	rs149859245	-0.018524	81710883	519288	0.002405	1.40994e-14	ebi-a-GCST90002351		C	T	0.781959	Neutrophil count	TRUE	reported	igd
14	rs72664840	0.020857	35596323	519288	0.002507	9.21086e-17	ebi-a-GCST90002351		T	C	0.178952	Neutrophil count	TRUE	reported	igd
14	rs72731564	0.020208	69280158	519288	0.00247	2.94985e-16	ebi-a-GCST90002351		T	C	0.187005	Neutrophil count	TRUE	reported	igd
14	rs4903580	0.016519	77850978	519288	0.001929	1.16011e-17	ebi-a-GCST90002351		T	C	0.456084	Neutrophil count	TRUE	reported	igd
14	rs10498635	-0.030199	93103309	519288	0.002491	8.72971e-34	ebi-a-GCST90002351		T	C	0.183683	Neutrophil count	TRUE	reported	igd
14	rs11625865	-0.015284	105644421	519288	0.002061	1.26009e-13	ebi-a-GCST90002351		A	G	0.61034	Neutrophil count	TRUE	reported	igd
15	rs62011281	0.012067	63781143	519288	0.002082	7.03008e-09	ebi-a-GCST90002351		A	G	0.310021	Neutrophil count	TRUE	reported	igd
15	rs67175901	0.043563	101748227	519288	0.003151	1.99022e-43	ebi-a-GCST90002351		T	C	0.107472	Neutrophil count	TRUE	reported	igd
15	rs2955958	0.012279	101916347	519288	0.002139	9.67008e-09	ebi-a-GCST90002351		A	G	0.315166	Neutrophil count	TRUE	reported	igd
15	rs4924450	0.013811	40597229	519288	0.002198	3.40001e-10	ebi-a-GCST90002351		A	G	0.70545	Neutrophil count	TRUE	reported	igd
15	rs7496362	0.017502	65758874	519288	0.002017	4.25991e-18	ebi-a-GCST90002351		G	C	0.366398	Neutrophil count	TRUE	reported	igd
15	rs2062250	0.047004	64672002	519288	0.004075	9.62055e-31	ebi-a-GCST90002351		A	G	0.938519	Neutrophil count	TRUE	reported	igd
15	rs4886830	0.01173	77094418	519288	0.001943	1.61002e-09	ebi-a-GCST90002351		T	A	0.489959	Neutrophil count	TRUE	reported	igd
15	rs4843073	0.013665	86124419	519288	0.002007	1.00995e-11	ebi-a-GCST90002351		T	C	0.644889	Neutrophil count	TRUE	reported	igd
15	rs7183988	-0.017034	91428589	519288	0.001973	6.26037e-18	ebi-a-GCST90002351		G	T	0.526501	Neutrophil count	TRUE	reported	igd
15	rs72726027	-0.043218	42248826	519288	0.003051	1.71002e-45	ebi-a-GCST90002351		C	T	0.11173	Neutrophil count	TRUE	reported	igd
15	rs12909505	-0.021426	51104350	519288	0.001943	2.99985e-28	ebi-a-GCST90002351		C	T	0.428567	Neutrophil count	TRUE	reported	igd
15	rs780142	0.012729	62797964	519288	0.002159	3.83999e-09	ebi-a-GCST90002351		G	T	0.274175	Neutrophil count	TRUE	reported	igd
15	rs11072516	0.015293	75224810	519288	0.00196	6.36063e-15	ebi-a-GCST90002351		A	T	0.448073	Neutrophil count	TRUE	reported	igd
16	rs35929659	-0.019551	2165630	519288	0.002634	1.21004e-13	ebi-a-GCST90002351		C	T	0.179844	Neutrophil count	TRUE	reported	igd
16	rs72832055	-0.012349	81869387	519288	0.002082	3.09001e-09	ebi-a-GCST90002351		A	G	0.313384	Neutrophil count	TRUE	reported	igd
16	rs12923918	-0.010496	24844403	519288	0.001921	4.81005e-08	ebi-a-GCST90002351		G	A	0.509359	Neutrophil count	TRUE	reported	igd
16	rs61739285	-0.040128	27480797	519288	0.005402	1.15001e-13	ebi-a-GCST90002351		T	C	0.03348	Neutrophil count	TRUE	reported	igd
16	rs16958642	0.022296	11864032	519288	0.00353	2.77e-10	ebi-a-GCST90002351		A	G	0.082607	Neutrophil count	TRUE	reported	igd
16	rs11574938	0.020345	30485393	519288	0.001947	1.57e-25	ebi-a-GCST90002351		C	G	0.519832	Neutrophil count	TRUE	reported	igd
16	rs1362623	0.018278	49885785	519288	0.002376	1.49005e-14	ebi-a-GCST90002351		T	C	0.207792	Neutrophil count	TRUE	reported	igd
16	rs75974417	-0.016574	57063494	519288	0.002361	2.32006e-12	ebi-a-GCST90002351		T	C	0.211414	Neutrophil count	TRUE	reported	igd
16	rs12930850	0.018982	81602212	519288	0.001938	1.29003e-22	ebi-a-GCST90002351		G	A	0.537098	Neutrophil count	TRUE	reported	igd
16	rs305082	0.036633	85936978	519288	0.002594	3.04018e-45	ebi-a-GCST90002351		C	T	0.172255	Neutrophil count	TRUE	reported	igd
16	rs72803323	0.034499	89373324	519288	0.004957	3.55959e-12	ebi-a-GCST90002351		T	C	0.039743	Neutrophil count	TRUE	reported	igd
16	rs4984803	-0.017523	1349929	519288	0.00205	1.33999e-17	ebi-a-GCST90002351		A	G	0.595619	Neutrophil count	TRUE	reported	igd
16	rs6500550	-0.022363	3746241	519288	0.00212	5.52968e-26	ebi-a-GCST90002351		T	C	0.304296	Neutrophil count	TRUE	reported	igd
16	rs11648664	-0.014176	53122486	519288	0.001963	5.43e-13	ebi-a-GCST90002351		A	G	0.402087	Neutrophil count	TRUE	reported	igd
16	rs12927351	0.021608	74596618	519288	0.002406	2.83009e-19	ebi-a-GCST90002351		A	C	0.198578	Neutrophil count	TRUE	reported	igd
17	rs78813154	0.01872	5267002	519288	0.002729	7.13017e-12	ebi-a-GCST90002351		T	G	0.144465	Neutrophil count	TRUE	reported	igd
17	rs10852834	-0.037094	16174506	519288	0.001924	9.66941e-83	ebi-a-GCST90002351		G	C	0.47801	Neutrophil count	TRUE	reported	igd
17	rs55767800	-0.011452	17674967	519288	0.002082	3.86999e-08	ebi-a-GCST90002351		C	T	0.633688	Neutrophil count	TRUE	reported	igd
17	rs11489942	-0.030315	37649419	519288	0.002427	9.1601e-36	ebi-a-GCST90002351		T	G	0.434426	Neutrophil count	TRUE	reported	igd
17	rs2617884	-0.01979	28120430	519288	0.001927	1.05003e-24	ebi-a-GCST90002351		C	G	0.496347	Neutrophil count	TRUE	reported	igd
17	rs146346285	0.057628	38897220	519288	0.008708	3.78007e-11	ebi-a-GCST90002351		T	C	0.014	Neutrophil count	TRUE	reported	igd
17	rs2665405	0.02951	57875292	519288	0.001927	6.74062e-53	ebi-a-GCST90002351		A	G	0.54844	Neutrophil count	TRUE	reported	igd
17	rs2001613	0.012012	75383679	519288	0.002004	2.12002e-09	ebi-a-GCST90002351		T	C	0.472052	Neutrophil count	TRUE	reported	igd
17	rs72901753	-0.014526	76244283	519288	0.002142	1.22999e-11	ebi-a-GCST90002351		C	G	0.326884	Neutrophil count	TRUE	reported	igd
17	rs9905106	0.022774	1373518	519288	0.002227	1.61994e-24	ebi-a-GCST90002351		C	T	0.733598	Neutrophil count	TRUE	reported	igd
17	rs16961474	-0.017035	17146619	519288	0.002794	1.10999e-09	ebi-a-GCST90002351		A	G	0.136787	Neutrophil count	TRUE	reported	igd
17	rs4794822	0.120222	38156712	519288	0.001963	1e-200	ebi-a-GCST90002351		T	C	0.387944	Neutrophil count	TRUE	reported	igd
17	rs820384	0.01193	73755392	519288	0.002136	2.39999e-08	ebi-a-GCST90002351		C	G	0.663193	Neutrophil count	TRUE	reported	igd
17	rs7225843	-0.022083	2001825	519288	0.002391	2.6903e-20	ebi-a-GCST90002351		C	T	0.203156	Neutrophil count	TRUE	reported	igd
17	rs11653826	0.025072	27653016	519288	0.003302	3.2802e-14	ebi-a-GCST90002351		T	C	0.098259	Neutrophil count	TRUE	reported	igd
17	rs56378716	0.129237	56356502	519288	0.008674	3.71963e-50	ebi-a-GCST90002351		G	A	0.012681	Neutrophil count	TRUE	reported	igd
17	rs113686433	0.021997	56803943	519288	0.003072	8.30042e-13	ebi-a-GCST90002351		G	A	0.135033	Neutrophil count	TRUE	reported	igd
17	rs749780	0.018874	72699384	519288	0.002179	4.93969e-18	ebi-a-GCST90002351		A	C	0.731874	Neutrophil count	TRUE	reported	igd
17	rs584438	-0.013031	38599172	519288	0.001995	6.68036e-11	ebi-a-GCST90002351		A	C	0.375715	Neutrophil count	TRUE	reported	igd
17	rs56301633	0.023695	44077850	519288	0.002309	1.13999e-24	ebi-a-GCST90002351		A	G	0.22431	Neutrophil count	TRUE	reported	igd
18	rs7235882	0.02332	19684119	519288	0.003325	2.39994e-12	ebi-a-GCST90002351		T	C	0.093478	Neutrophil count	TRUE	reported	igd
18	rs78285907	0.021937	21622003	519288	0.003483	3.11e-10	ebi-a-GCST90002351		T	A	0.089011	Neutrophil count	TRUE	reported	igd
18	rs303753	-0.022761	21074922	519288	0.002045	9.56974e-29	ebi-a-GCST90002351		A	G	0.345097	Neutrophil count	TRUE	reported	igd
18	rs2926999	0.015933	51727063	519288	0.002062	1.15001e-14	ebi-a-GCST90002351		A	G	0.356107	Neutrophil count	TRUE	reported	igd
18	rs72973711	-0.036483	74072245	519288	0.003879	5.52968e-21	ebi-a-GCST90002351		T	A	0.06693	Neutrophil count	TRUE	reported	igd
18	rs9965539	0.031107	41973779	519288	0.002856	1.3499e-27	ebi-a-GCST90002351		A	G	0.133702	Neutrophil count	TRUE	reported	igd
18	rs17742008	-0.017804	48124763	519288	0.002354	4.10015e-14	ebi-a-GCST90002351		A	C	0.212295	Neutrophil count	TRUE	reported	igd
18	rs4468717	-0.024976	3457606	519288	0.003608	4.58987e-12	ebi-a-GCST90002351		T	C	0.077663	Neutrophil count	TRUE	reported	igd
18	rs55874505	-0.018499	43816804	519288	0.002069	4.05976e-19	ebi-a-GCST90002351		G	T	0.584135	Neutrophil count	TRUE	reported	igd
18	rs763362	0.015565	67531797	519288	0.001962	2.22998e-15	ebi-a-GCST90002351		G	A	0.398747	Neutrophil count	TRUE	reported	igd
18	rs12232734	0.015687	74253960	519288	0.002562	9.42996e-10	ebi-a-GCST90002351		A	T	0.186388	Neutrophil count	TRUE	reported	igd
19	rs10412541	-0.011011	10674558	519288	0.001962	2.06001e-08	ebi-a-GCST90002351		A	G	0.488786	Neutrophil count	TRUE	reported	igd
19	rs56408111	0.031091	19793545	519288	0.003521	1.10994e-18	ebi-a-GCST90002351		C	T	0.083714	Neutrophil count	TRUE	reported	igd
19	rs4760	-0.075213	44153100	519288	0.002693	1.41906e-171	ebi-a-GCST90002351		G	A	0.153372	Neutrophil count	TRUE	reported	igd
19	rs571497	-0.037928	7827830	519288	0.002701	9.75888e-45	ebi-a-GCST90002351		A	G	0.154629	Neutrophil count	TRUE	reported	igd
19	rs4808683	-0.01228	17862925	519288	0.001958	3.67003e-10	ebi-a-GCST90002351		G	C	0.458189	Neutrophil count	TRUE	reported	igd
19	rs386243	-0.026404	49127490	519288	0.00229	1.02991e-30	ebi-a-GCST90002351		T	C	0.250107	Neutrophil count	TRUE	reported	igd
19	rs10409243	-0.021916	10332988	519288	0.002078	5.55009e-26	ebi-a-GCST90002351		T	C	0.601086	Neutrophil count	TRUE	reported	igd
19	rs8112528	-0.013833	39977173	519288	0.002475	2.35001e-08	ebi-a-GCST90002351		A	G	0.190498	Neutrophil count	TRUE	reported	igd
19	rs11673093	-0.048844	45742094	519288	0.002196	1.44877e-109	ebi-a-GCST90002351		A	G	0.259947	Neutrophil count	TRUE	reported	igd
19	rs930232	0.021247	1036018	519288	0.002045	2.91005e-25	ebi-a-GCST90002351		A	G	0.460333	Neutrophil count	TRUE	reported	igd
19	rs28540102	0.01708	4975763	519288	0.00205	8.50942e-17	ebi-a-GCST90002351		C	T	0.658597	Neutrophil count	TRUE	reported	igd
19	rs150665764	0.04705	14499614	519288	0.007976	3.74999e-09	ebi-a-GCST90002351		C	G	0.017146	Neutrophil count	TRUE	reported	igd
19	rs1985157	0.026496	18513594	519288	0.002038	1.29003e-38	ebi-a-GCST90002351		C	T	0.410403	Neutrophil count	TRUE	reported	igd
19	rs4805881	-0.014435	33896432	519288	0.002068	3.05e-12	ebi-a-GCST90002351		C	A	0.665289	Neutrophil count	TRUE	reported	igd
20	rs12481262	-0.014609	8126920	519288	0.002019	4.78961e-13	ebi-a-GCST90002351		C	T	0.460009	Neutrophil count	TRUE	reported	igd
20	rs2179593	-0.01233	42660286	519288	0.002141	8.62005e-09	ebi-a-GCST90002351		A	C	0.715877	Neutrophil count	TRUE	reported	igd
20	rs6067411	-0.011615	48975411	519288	0.00195	2.63998e-09	ebi-a-GCST90002351		T	C	0.528523	Neutrophil count	TRUE	reported	igd
20	rs1555275	-0.01369	55969270	519288	0.002046	2.29985e-11	ebi-a-GCST90002351		G	A	0.649639	Neutrophil count	TRUE	reported	igd
20	rs4812447	0.017142	39272620	519288	0.001949	1.49005e-18	ebi-a-GCST90002351		G	A	0.440364	Neutrophil count	TRUE	reported	igd
20	rs1800961	-0.051942	43042364	519288	0.005553	8.99083e-21	ebi-a-GCST90002351		T	C	0.031018	Neutrophil count	TRUE	reported	igd
20	rs2254458	-0.013414	1551485	519288	0.0021	1.75999e-10	ebi-a-GCST90002351		T	C	0.644615	Neutrophil count	TRUE	reported	igd
20	rs156338	-0.012086	1854678	519288	0.002042	3.32001e-09	ebi-a-GCST90002351		T	C	0.435513	Neutrophil count	TRUE	reported	igd
20	rs633284	0.014955	2904143	519288	0.002028	1.7398e-13	ebi-a-GCST90002351		T	A	0.516133	Neutrophil count	TRUE	reported	igd
20	rs2315008	0.016403	62343956	519288	0.002058	1.63983e-15	ebi-a-GCST90002351		G	T	0.666951	Neutrophil count	TRUE	reported	igd
21	rs62239920	-0.016198	18944889	519288	0.002529	1.55998e-10	ebi-a-GCST90002351		A	G	0.202834	Neutrophil count	TRUE	reported	igd
21	rs1788493	0.013157	44469063	519288	0.001958	1.88018e-11	ebi-a-GCST90002351		T	C	0.499803	Neutrophil count	TRUE	reported	igd
21	rs9977672	-0.022323	40463283	519288	0.002215	7.34007e-24	ebi-a-GCST90002351		A	G	0.2588	Neutrophil count	TRUE	reported	igd
21	rs2839166	-0.01317	47656712	519288	0.00196	1.90985e-11	ebi-a-GCST90002351		C	T	0.398246	Neutrophil count	TRUE	reported	igd
21	rs7283930	-0.012725	30461373	519288	0.0022	7.43002e-09	ebi-a-GCST90002351		T	C	0.739014	Neutrophil count	TRUE	reported	igd
22	rs41433144	-0.03459	17569993	519288	0.004882	1.45011e-12	ebi-a-GCST90002351		A	T	0.042937	Neutrophil count	TRUE	reported	igd
22	rs2330721	0.012815	24403541	519288	0.002042	3.58996e-10	ebi-a-GCST90002351		T	C	0.52229	Neutrophil count	TRUE	reported	igd
22	rs738408	-0.01613	44324730	519288	0.002355	7.73927e-12	ebi-a-GCST90002351		T	C	0.216873	Neutrophil count	TRUE	reported	igd
22	rs5747308	0.022058	18133500	519288	0.001925	2.29985e-30	ebi-a-GCST90002351		C	A	0.504471	Neutrophil count	TRUE	reported	igd
22	rs35955747	0.018967	31813058	519288	0.001985	1.33999e-21	ebi-a-GCST90002351		T	A	0.538868	Neutrophil count	TRUE	reported	igd
22	rs9605901	0.031888	18906630	519288	0.00525	1.29e-09	ebi-a-GCST90002351		T	C	0.040485	Neutrophil count	TRUE	reported	igd
22	rs139386	-0.010925	39530859	519288	0.001974	3.21004e-08	ebi-a-GCST90002351		C	T	0.445089	Neutrophil count	TRUE	reported	igd
22	rs47341	0.013023	43560763	519288	0.002052	2.26001e-10	ebi-a-GCST90002351		T	C	0.395885	Neutrophil count	TRUE	reported	igd
8	rs10103048	0.106198	130602281	5357	0.0189779	2.30404e-08	ssZgOl		A	C	0.3925	Blood protein levels of myeloperoxidase	TRUE	reported
17	rs12948186	-0.630327	56175361	5357	0.0398262	3.56944e-55	ssZgOl		G	A	0.05684	Blood protein levels of myeloperoxidase	TRUE	reported
17	rs139237904	-0.510999	56998480	5357	0.0651624	5.31741e-15	ssZgOl		T	C	0.02051	Blood protein levels of myeloperoxidase	TRUE	reported
17	rs190383363	-0.648174	57312769	5357	0.0806467	1.12202e-15	ssZgOl		T	C	0.01353	Blood protein levels of myeloperoxidase	TRUE	reported
17	rs3744376	-0.355878	58156064	5357	0.0506973	2.5015e-12	ssZgOl		A	G	0.0343	Blood protein levels of myeloperoxidase	TRUE	reported
