# Supplementary material for: Mendelian randomization study on the causal link between neutrophil extracellular traps and cardiovascular diseases
Source: Research Square preprint supplement (doi:10.21203/rs.3.rs-7056612/v1), 2025-08-22
Supplement: Supplementary file 2 [file b076100d73b48aaadc1156f3.docx]

**Table S1. Information of included GWAS data**

| **Trait** | **GWAS ID** | **case/control** | **SNPs** |
| --- | --- | --- | --- |
| Heart failure | ebi-a-GCST009541 | 47,309/ 930,014 | 7,773,021 |
| myocardial infarction | ebi-a-GCST90038610 | 11,081/ 473,517 | 9,587,836 |
| Coronary artery disease | ebi-a-GCST005195 | 122,733/ 424,528 | 7,934,254 |
| Atrial fibrillation | ebi-a-GCST006414 | 60,620/ 970,216 | 33,519,037 |
| Stroke | ebi-a-GCST90038613 | 6,925/ 477,673 | 9,587,836 |
| atherosclerosis | GCST90044006 | 106/ 456,242 | 11,842,647 |
| Neutrophil Extracellular Traps measurement | GCST90137414 | 657 | 9,670,724 |
| Neutrophil count | GCST90002351 | 519288 | 50,250,472 |
| Interleukin-4 levels | GCST004453 | 8124 | 10,700,000 |
| Interleukin-5 levels | GCST004452 | 3364 | 10,700,000 |
| Interleukin-13 levels | GCST004443 | 3557 | 10,700,000 |
| Blood protein levels of myeloperoxidase | GCST90087967 | 5357 | 7,506,463 |
| Blood protein levels of myeloperoxidase-DNA complexes | GCST90013658 | 5590 | 11,789,982 |

**Table S3 Proxy SNPs records**

| **Primary SNPs** | **Proxy SNPs** |
| --- | --- |
| rs13106889 | rs17061074 |
| rs3845532 | rs140884047 |
| rs2046934 | rs1388626 |
| rs28723563 | rs28535909 |
| rs2219143 | rs34881325 |
| rs4413892 | rs13290734 |
| rs61904448 | rs55751855 |
| rs55874505 | rs9955853 |

**Table S5 Results of the heterogeneity and horizontal pleiotropy tests for instrumental variables**

| **Exposure** | **Outcome** | **Heterogeneity** | |  | **Pleiotropy** | |
| --- | --- | --- | --- | --- | --- | --- |
| **Q statistic (IVW)** | ***P* value** |  | **MR-Egger Intercept** | ***P* value** |
| Blood protein levels of myeloperoxidase | atherosclerosis | 2.501 | 0.644 |  | 0.056 | 0.774 |
| Blood protein levels of myeloperoxidase | Coronary artery disease | 3.281 | 0.35 |  | -0.001 | 0.923 |
| Blood protein levels of myeloperoxidase | Atrial fibrillation | 1.69 | 0.793 |  | -0.004 | 0.639 |
| Blood protein levels of myeloperoxidase | Heart failure | 5.72 | 0.057 |  | -0.024 | 0.255 |
| Blood protein levels of myeloperoxidase | myocardial infarction | 3.784 | 0.436 |  | <0.001 | 0.76 |
| Blood protein levels of myeloperoxidase | Stroke | 3.379 | 0.496 |  | <0.001 | 0.343 |
| Blood protein levels of myeloperoxidase-DNA complexes | atherosclerosis | 18.981 | 0.025 |  | 0.14 | 0.473 |
| Blood protein levels of myeloperoxidase-DNA complexes | Coronary artery disease | 12.579 | 0.127 |  | -0.002 | 0.818 |
| Blood protein levels of myeloperoxidase-DNA complexes | Atrial fibrillation | 11.731 | 0.229 |  | 0.001 | 0.936 |
| Blood protein levels of myeloperoxidase-DNA complexes | Heart failure | 3.914 | 0.688 |  | <0.001 | 0.982 |
| Blood protein levels of myeloperoxidase-DNA complexes | myocardial infarction | 12.029 | 0.212 |  | <0.001 | 0.71 |
| Blood protein levels of myeloperoxidase-DNA complexes | Stroke | 14.163 | 0.117 |  | <0.001 | 0.521 |
| Interleukin-13 levels | atherosclerosis | 16.974 | 0.075 |  | 0.066 | 0.69 |
| Interleukin-13 levels | Coronary artery disease | 8.42 | 0.588 |  | 0.007 | 0.292 |
| Interleukin-13 levels | Atrial fibrillation | 11.243 | 0.423 |  | -0.002 | 0.785 |
| Interleukin-13 levels | Heart failure | 2.846 | 0.985 |  | 0.002 | 0.762 |
| Interleukin-13 levels | myocardial infarction | 9.414 | 0.584 |  | <0.001 | 0.922 |
| Interleukin-13 levels | Stroke | 10.307 | 0.503 |  | <0.001 | 0.347 |
| Interleukin-4 levels | atherosclerosis | 13.071 | 0.22 |  | -0.096 | 0.529 |
| Interleukin-4 levels | Coronary artery disease | 9.659 | 0.379 |  | -0.001 | 0.894 |
| Interleukin-4 levels | Atrial fibrillation | 22.029 | 0.015 |  | 0.004 | 0.69 |
| Interleukin-4 levels | Heart failure | 13.076 | 0.159 |  | 0.003 | 0.79 |
| Interleukin-4 levels | myocardial infarction | 7.929 | 0.541 |  | <0.001 | 0.454 |
| Interleukin-4 levels | Stroke | 7.488 | 0.586 |  | <0.001 | 0.7 |
| Interleukin-5 levels | atherosclerosis | 2.499 | 0.645 |  | -0.308 | 0.279 |
| Interleukin-5 levels | Coronary artery disease | 2.68 | 0.613 |  | 0.014 | 0.331 |
| Interleukin-5 levels | Atrial fibrillation | 5.189 | 0.268 |  | -0.009 | 0.551 |
| Interleukin-5 levels | Heart failure | 0.429 | 0.98 |  | 0.008 | 0.622 |
| Interleukin-5 levels | myocardial infarction | 4.518 | 0.211 |  | <0.001 | 0.648 |
| Interleukin-5 levels | Stroke | 6.871 | 0.076 |  | <0.001 | 0.844 |
| Neutrophil Extracellular Traps measurement | atherosclerosis | 24.817 | 0.024 |  | -0.081 | 0.747 |
| Neutrophil Extracellular Traps measurement | Coronary artery disease | 9.931 | 0.767 |  | 0.002 | 0.787 |
| Neutrophil Extracellular Traps measurement | Atrial fibrillation | 17.229 | 0.305 |  | -0.002 | 0.849 |
| Neutrophil Extracellular Traps measurement | Heart failure | 13.082 | 0.441 |  | 0.023 | 0.061 |
| Neutrophil Extracellular Traps measurement | myocardial infarction | 5.103 | 0.991 |  | <0.001 | 0.738 |
| Neutrophil Extracellular Traps measurement | Stroke | 10.3 | 0.8 |  | <0.001 | 0.132 |
| Neutrophil count | atherosclerosis | 379.88 | 0.81 |  | -0.009 | 0.581 |
| Neutrophil count | Coronary artery disease | 1172.094 | <0.001 |  | 0.001 | 0.421 |
| Neutrophil count | Atrial fibrillation | 870.53 | <0.001 |  | -0.002 | 0.031 |
| Neutrophil count | Heart failure | 602.378 | <0.001 |  | <0.001 | 0.887 |
| Neutrophil count | myocardial infarction | 789.22 | <0.001 |  | <0.001 | 0.875 |
| Neutrophil count | Stroke | 505.754 | 0.001 |  | <0.001 | 0.047 |

**Table S6 MR-PRESSO test**

| **Exposure** | **Outcome** | **Raw** | | **Outlier corrected** | | **Global P** | **Number of outliers** | **Distortion P** |
| --- | --- | --- | --- | --- | --- | --- | --- | --- |
| **OR (CI%)** | ***P*** | **OR (CI%)** | ***P*** |
| Blood protein levels of myeloperoxidase | Atrial fibrillation | 0.9851 ( 0.9642 - 1.0064 ) | 0.24 | NA | NA | 0.852 | 0 | NA |
| Blood protein levels of myeloperoxidase | Coronary artery disease | 1.0008 ( 0.9644 - 1.0385 ) | 0.969 | NA | NA | 0.45 | 0 | NA |
| Blood protein levels of myeloperoxidase | Stroke | 0.9999 ( 0.9989 - 1.001 ) | 0.917 | NA | NA | 0.611 | 0 | NA |
| Blood protein levels of myeloperoxidase | atherosclerosis | 0.6873 ( 0.4027 - 1.173 ) | 0.241 | NA | NA | 0.634 | 0 | NA |
| Blood protein levels of myeloperoxidase | myocardial infarction | 0.9997 ( 0.9982 - 1.0011 ) | 0.662 | NA | NA | 0.458 | 0 | NA |
| Blood protein levels of myeloperoxidase-DNA complexes | Atrial fibrillation | 0.9722 ( 0.9185 - 1.029 ) | 0.356 | NA | NA | 0.265 | 0 | NA |
| Blood protein levels of myeloperoxidase-DNA complexes | Coronary artery disease | 0.9493 ( 0.8853 - 1.0179 ) | 0.182 | NA | NA | 0.141 | 0 | NA |
| Blood protein levels of myeloperoxidase-DNA complexes | Heart failure | 1.0593 ( 0.9973 - 1.1251 ) | 0.11 | NA | NA | 0.723 | 0 | NA |
| Blood protein levels of myeloperoxidase-DNA complexes | Stroke | 0.9999 ( 0.9978 - 1.002 ) | 0.954 | NA | NA | 0.135 | 0 | NA |
| Blood protein levels of myeloperoxidase-DNA complexes | atherosclerosis | 0.7443 ( 0.181 - 3.0612 ) | 0.692 | NA | NA | 0.027 | 0 | NA |
| Blood protein levels of myeloperoxidase-DNA complexes | myocardial infarction | 1.0016 ( 0.9991 - 1.004 ) | 0.24 | NA | NA | 0.257 | 0 | NA |
| Interleukin-13 levels | Atrial fibrillation | 1.0142 ( 0.9908 - 1.0381 ) | 0.263 | NA | NA | 0.493 | 0 | NA |
| Interleukin-13 levels | Coronary artery disease | 1.0086 ( 0.9873 - 1.0304 ) | 0.448 | NA | NA | 0.664 | 0 | NA |
| Interleukin-13 levels | Heart failure | 1.0135 ( 0.9987 - 1.0285 ) | 0.105 | NA | NA | 0.983 | 0 | NA |
| Interleukin-13 levels | Stroke | 1.0005 ( 0.9997 - 1.0012 ) | 0.257 | NA | NA | 0.577 | 0 | NA |
| Interleukin-13 levels | atherosclerosis | 0.8092 ( 0.4425 - 1.4798 ) | 0.507 | NA | NA | 0.151 | 0 | NA |
| Interleukin-13 levels | myocardial infarction | 0.9993 ( 0.9984 - 1.0002 ) | 0.174 | NA | NA | 0.67 | 0 | NA |
| Interleukin-4 levels | Atrial fibrillation | 0.9965 ( 0.9373 - 1.0593 ) | 0.911 | 0.9788 ( 0.9309 - 1.0291 ) | 0.421 | 0.038 | 1 | 0.742 |
| Interleukin-4 levels | Coronary artery disease | 0.999 ( 0.955 - 1.045 ) | 0.965 | NA | NA | 0.409 | 0 | NA |
| Interleukin-4 levels | Heart failure | 0.9988 ( 0.9377 - 1.0638 ) | 0.97 | NA | NA | 0.127 | 0 | NA |
| Interleukin-4 levels | Stroke | 0.9999 ( 0.9985 - 1.0013 ) | 0.9 | NA | NA | 0.602 | 0 | NA |
| Interleukin-4 levels | atherosclerosis | 0.4023 ( 0.1491 - 1.0854 ) | 0.102 | NA | NA | 0.306 | 0 | NA |
| Interleukin-4 levels | myocardial infarction | 0.9998 ( 0.9979 - 1.0017 ) | 0.836 | NA | NA | 0.53 | 0 | NA |
| Interleukin-5 levels | Atrial fibrillation | 0.9967 ( 0.9508 - 1.0449 ) | 0.897 | NA | NA | 0.386 | 0 | NA |
| Interleukin-5 levels | Coronary artery disease | 1.0218 ( 0.9729 - 1.0732 ) | 0.428 | NA | NA | 0.406 | 0 | NA |
| Interleukin-5 levels | Heart failure | 0.9935 ( 0.961 - 1.0271 ) | 0.717 | NA | NA | 0.838 | 0 | NA |
| Interleukin-5 levels | Stroke | 0.9991 ( 0.997 - 1.0013 ) | 0.465 | NA | NA | 0.19 | 0 | NA |
| Interleukin-5 levels | atherosclerosis | 0.7013 ( 0.2484 - 1.9802 ) | 0.533 | NA | NA | 0.284 | 0 | NA |
| Interleukin-5 levels | myocardial infarction | 0.9996 ( 0.9974 - 1.0018 ) | 0.718 | NA | NA | 0.369 | 0 | NA |
| Neutrophil Extracellular Traps measurement | Atrial fibrillation | 1.006 ( 0.9984 - 1.0137 ) | 0.139 | NA | NA | 0.278 | 0 | NA |
| Neutrophil Extracellular Traps measurement | Coronary artery disease | 1.0014 ( 0.9954 - 1.0075 ) | 0.652 | NA | NA | 0.75 | 0 | NA |
| Neutrophil Extracellular Traps measurement | Heart failure | 1.0003 ( 0.9915 - 1.0092 ) | 0.945 | NA | NA | 0.446 | 0 | NA |
| Neutrophil Extracellular Traps measurement | Stroke | 1 ( 0.9998 - 1.0002 ) | 0.787 | NA | NA | 0.677 | 0 | NA |
| Neutrophil Extracellular Traps measurement | atherosclerosis | 0.9482 ( 0.772 - 1.1646 ) | 0.62 | 0.8865 ( 0.7566 - 1.0387 ) | 0.162 | 0.034 | 1 | 0.559 |
| Neutrophil Extracellular Traps measurement | myocardial infarction | 1 ( 0.9998 - 1.0002 ) | 0.925 | NA | NA | 0.989 | 0 | NA |
| Neutrophil count | Atrial fibrillation | 1.0286 ( 0.9806 - 1.079 ) | 0.249 | 1.0459 ( 1.003 - 1.0907 ) | 0.036 | <0.001 | 14 | 0.609 |
| Neutrophil count | Coronary artery disease | 1.0769 ( 1.0168 - 1.1406 ) | 0.012 | 1.082 ( 1.0321 - 1.1343 ) | 0.001 | <0.001 | 18 | 0.85 |
| Neutrophil count | Heart failure | 1.0104 ( 0.9634 - 1.0598 ) | 0.67 | 1.0184 ( 0.9744 - 1.0644 ) | 0.418 | <0.001 | 6 | 0.837 |
| Neutrophil count | Stroke | 1.0006 ( 0.9993 - 1.0018 ) | 0.38 | 1.0004 ( 0.9992 - 1.0016 ) | 0.512 | <0.001 | 1 | 0.713 |
| Neutrophil count | atherosclerosis | 0.9211 ( 0.4962 - 1.7097 ) | 0.795 | NA | NA | 0.85 | 0 | NA |
| Neutrophil count | myocardial infarction | 1.0014 ( 0.9994 - 1.0033 ) | 0.171 | 1.0011 ( 0.9994 - 1.0028 ) | 0.219 | <0.001 | 10 | 0.69 |
